# Supplementary material for: Amine-containing donepezil analogues as potent acetylcholinesterase inhibitors with increased polarity
Source: Royal Society of Chemistry journal article supplement (doi:10.1039/d3md00635b), 2024-01-01
Supplement: d3md00635b1.pdf [file d3md00635b1.pdf]

## SUPPORTING INFORMATION

### **Amine-containing Donepezil Analogues as Potent Acetylcholinesterase Inhibitors with Increased Polarity**

Jonas Kaltbeitzel<sup>1,3,4</sup>, Christian Kersten<sup>2</sup>, Peter Wich<sup>1,3,4</sup>

<sup>1</sup>School of Chemical Engineering, University of New South Wales, Sydney, NSW 2052,  
Australia

<sup>2</sup>Institute of Pharmaceutical and Biomedical Sciences, Johannes Gutenberg-University,  
Staudingerweg 5, 55128 Mainz, Germany

<sup>3</sup>Australian Centre for Nanomedicine, University of New South Wales, Sydney, NSW 2052,  
Australia

<sup>4</sup>Centre for Advanced Macromolecular Design, University of New South Wales, Sydney,  
NSW 2052, Australia

## Table of Contents

|                                                                               |    |
|-------------------------------------------------------------------------------|----|
| 1. Materials .....                                                            | 3  |
| 2. Analytical Data of Inhibitors .....                                        | 4  |
| Donepezil (2a) .....                                                          | 4  |
| Donepezil-amide (2b) .....                                                    | 5  |
| Donepezil-(CH <sub>2</sub> ) <sub>2</sub> -NH <sub>2</sub> · 2 HCl (2c) ..... | 7  |
| Donepezil-(CH <sub>2</sub> ) <sub>3</sub> -NH <sub>2</sub> · 2 HCl (2d) ..... | 9  |
| Donepezil-(CH <sub>2</sub> ) <sub>4</sub> -NH <sub>2</sub> · 2 HCl (2e) ..... | 10 |
| <i>p</i> -Amino-donepezil · 2 HCl (2f) .....                                  | 12 |
| <i>m</i> -Amino-donepezil · 2 HCl (2g) .....                                  | 14 |
| <i>p</i> -Aminomethyl donepezil · 2 HCl (2h) .....                            | 16 |
| <i>m</i> -Aminomethyl donepezil · 2 HCl (2i) .....                            | 18 |
| <i>m</i> -Benzamide donepezil · HCl (2j) .....                                | 20 |
| <i>p</i> -Carboxy donepezil · N(Et) <sub>3</sub> (2k) .....                   | 22 |
| Piperidine 4-methyl phthalimide · HCl (5a) .....                              | 24 |
| Piperidine 4-ethyl phthalimide · HCl (5b) .....                               | 25 |
| Benzyl-piperidine 4-methyl phthalimide · HCl (6a) .....                       | 26 |
| 4-Amino benzyl-piperidine 4-methyl phthalimide · 2 HCl (6b) .....             | 27 |
| Benzyl-piperidine 4-ethyl phthalimide · HCl (6c) .....                        | 28 |
| Benzoyl-piperidine 4-ethyl phthalimide (6d) .....                             | 29 |
| Phth-Et-Bn-4-amine · 2 HCl (6e) .....                                         | 30 |
| Phth-Et-Bn-3-amine · 2 HCl (6f) .....                                         | 32 |
| Phth-Et-Bn-4-methylamine · 2 HCl (6g) .....                                   | 34 |
| Phth-Et-Bn-3-methylamine · 2 HCl (6h) .....                                   | 35 |
| 3. Determination of Acetylcholinesterase Activity .....                       | 36 |
| 4. Molecular Docking Data .....                                               | 37 |
| 5. References .....                                                           | 40 |

## 1. Materials

All commercially available starting materials, reagents, and solvents were used as supplied unless otherwise stated. Reported yields are isolated yields. Proton ( $^1\text{H}$ ) and carbon ( $^{13}\text{C}$ ) NMR were collected on Bruker NMR spectrometer at 400 MHz for  $^1\text{H}$  and 100 MHz for  $^{13}\text{C}$ . Chemical shifts ( $\delta$ ) are reported in parts-per-million (ppm) relative to the residual undeuterated solvent. High-resolution mass spectra were obtained using electron spray ionization (ESI).

Inhibitors 2c,<sup>1</sup> 2f, 2g, and 2k<sup>2</sup> were previously synthesised, but not tested for their AChE inhibition. 2a,b<sup>3</sup> and 6c<sup>4</sup> were synthesised by Sugimoto et al. during the development of donepezil and tested for their inhibition against AChE.

## 2. Analytical Data of Inhibitors

### Donepezil (2a)

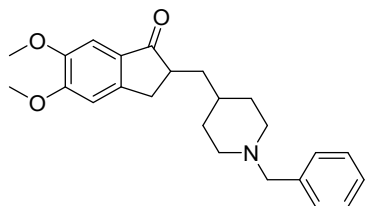

*2-((1-benzylpiperidin-4-yl)methyl)-5,6-dimethoxy-2,3-dihydro-1H-inden-1-one*

Obtained through the reaction of **1** with benzyl bromide, yellow oil, (63 %)

**<sup>1</sup>H NMR** (400 MHz, CDCl<sub>3</sub>)  $\delta$  11.90 (s, 1H), 7.61 (ddd,  $J$  = 4.8, 3.4, 1.7 Hz, 2H), 7.43 – 7.27 (m, 3H), 7.04 (s, 1H), 6.78 (s, 1H), 4.16 (dd,  $J$  = 5.1, 1.8 Hz, 2H), 3.89 (s, 3H), 3.82 (s, 3H), 3.53 – 3.32 (m, 2H), 3.28 – 3.09 (m, 1H), 2.90 – 2.40 (m, 5H), 2.10 – 1.70 (m, 6H), 1.42 (dt,  $J$  = 13.6, 7.5 Hz, 1H).

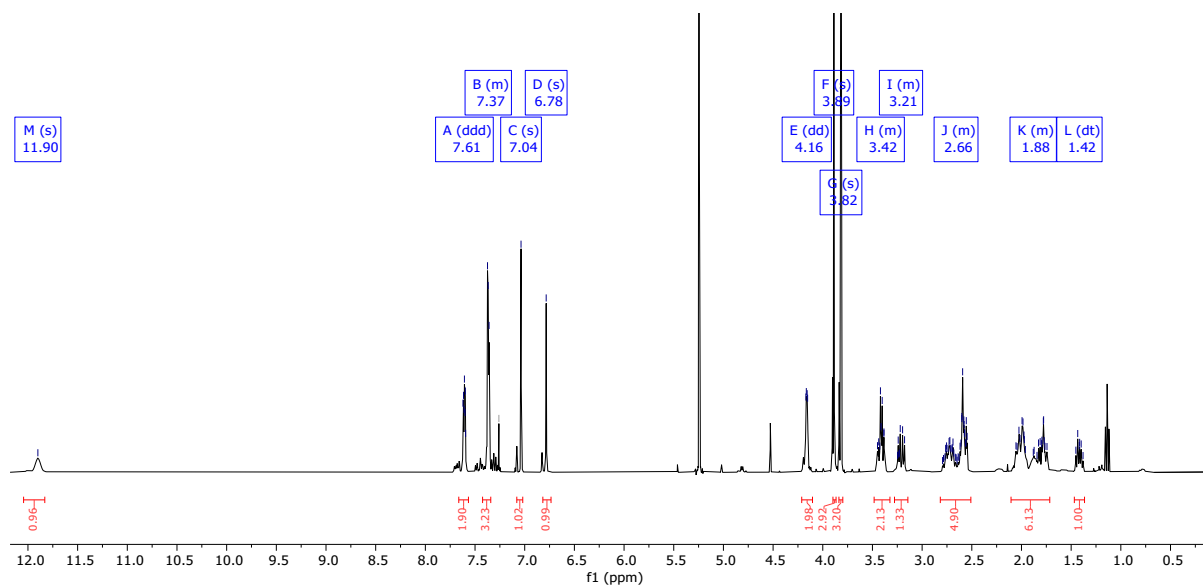

## Donepezil-amide (2b)

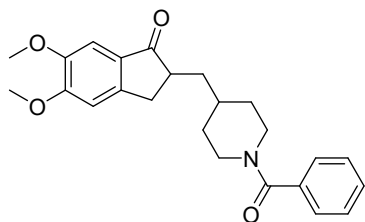

*2-((1-benzoylpiperidin-4-yl)methyl)-5,6-dimethoxy-2,3-dihydro-1H-inden-1-one*

Obtained through the reaction of **1** with benzoyl chloride, yellow oil, (98 %)

**<sup>1</sup>H NMR** (400 MHz, CDCl<sub>3</sub>)  $\delta$  7.35 (s, 5H), 7.12 (s, 1H), 6.83 (s, 1H), 4.68 (s, 1H), 3.91 (s, 3H), 3.85 (s, 3H), 3.79 – 3.59 (m, 1H), 3.22 (dd,  $J = 17.4, 8.0$  Hz, 1H), 3.04 – 2.72 (m, 3H), 2.71 – 2.61 (m, 2H), 1.97 – 1.55 (m, 4H), 1.43 – 0.96 (m, 3H).

**<sup>13</sup>C NMR** (101 MHz, CD<sub>3</sub>CN)  $\delta$  207.95, 170.57, 156.66, 150.55, 150.00, 137.97, 134.03, 130.53, 130.21, 129.91, 129.49, 129.36, 127.65, 118.26, 108.95, 104.91, 79.30, 78.98, 78.66, 56.79, 56.50, 45.92, 39.22, 35.35, 33.79.

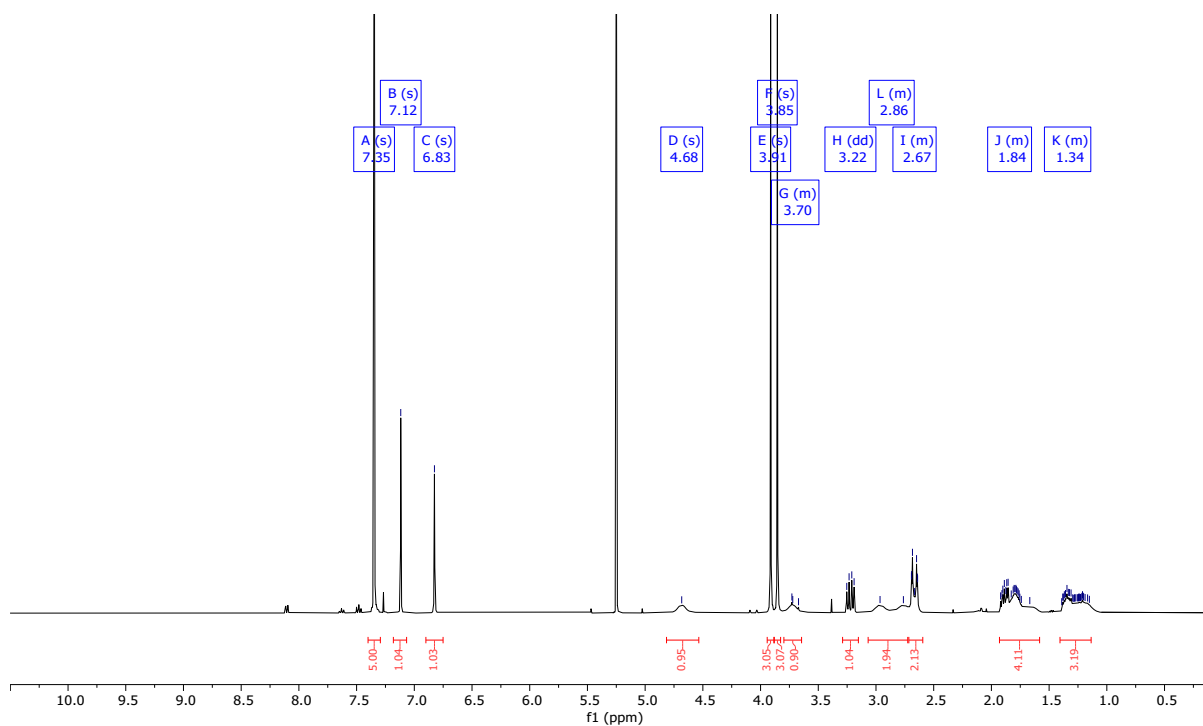

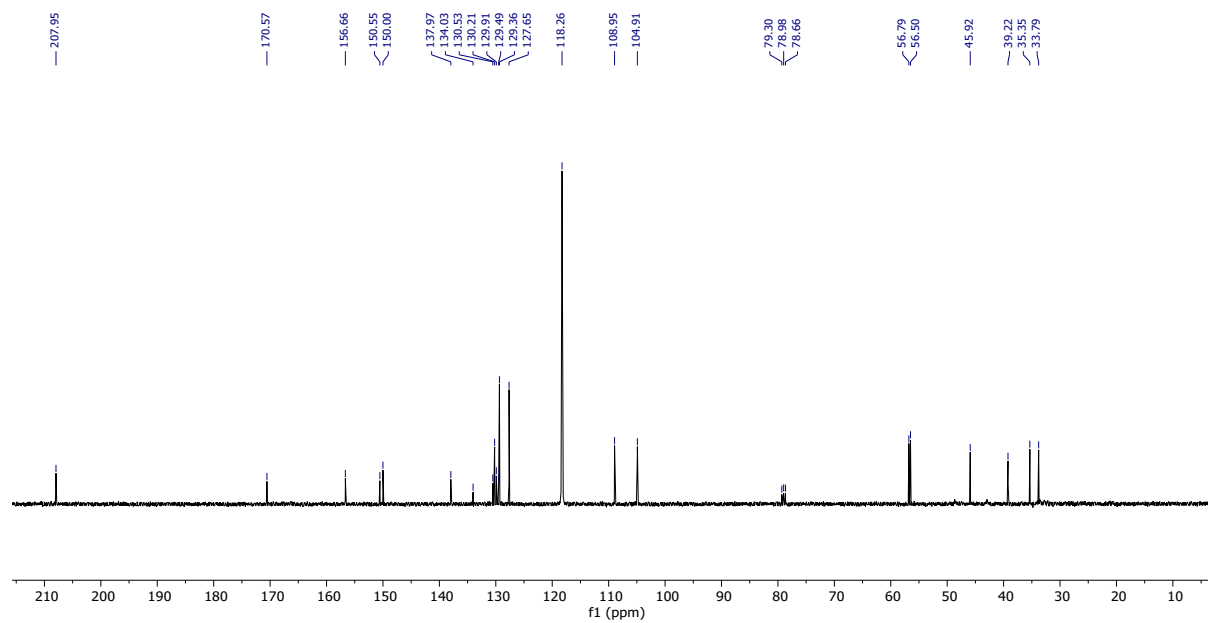

**Donepezil-(CH<sub>2</sub>)<sub>2</sub>-NH<sub>2</sub> · 2 HCl (2c)**

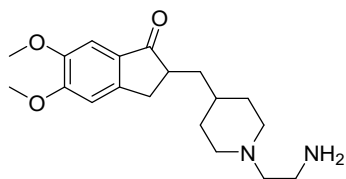

*2-((1-(2-aminoethyl)piperidin-4-yl)methyl)-5,6-dimethoxy-2,3-dihydro-1H-inden-1-one*

Obtained through the reaction of **1** with *N*-Boc-2-chloroethylamine and subsequent boc-deprotection, colourless solid (71 %).

**<sup>1</sup>H NMR** (400 MHz, D<sub>2</sub>O) δ 6.74 (s, 1H), 6.68 (s, 1H), 3.86 (dd, 5.4 Hz, 1H), 3.77 (s, 3H), 3.73 – 3.67 (m, 5H), 3.40 (t, *J* = 5.5 Hz, 1H), 3.12 (tt, *J* = 12.5, 3.1 Hz, 2H), 3.05 – 2.89 (m, 1H), 2.53 – 2.32 (m, 2H), 2.16 – 1.95 (m, 2H), 1.79 (ddd, *J* = 12.7, 8.3, 4.3 Hz, 1H), 1.70 – 1.41 (m, 3H), 1.27 (ddd, *J* = 13.4, 11.2, 4.9 Hz, 1H).

**<sup>13</sup>C NMR** (101 MHz, D<sub>2</sub>O) δ 211.35, 155.41, 151.42, 148.18, 127.33, 107.54, 103.29, 55.91, 55.36, 53.61, 52.86, 44.87, 41.14, 40.62, 36.72, 33.80, 32.55, 31.17, 29.76, 28.49.

**ESI [M+H]<sup>+</sup>**: 333.2173 found: 333.2171

**Purity:** 94.2%

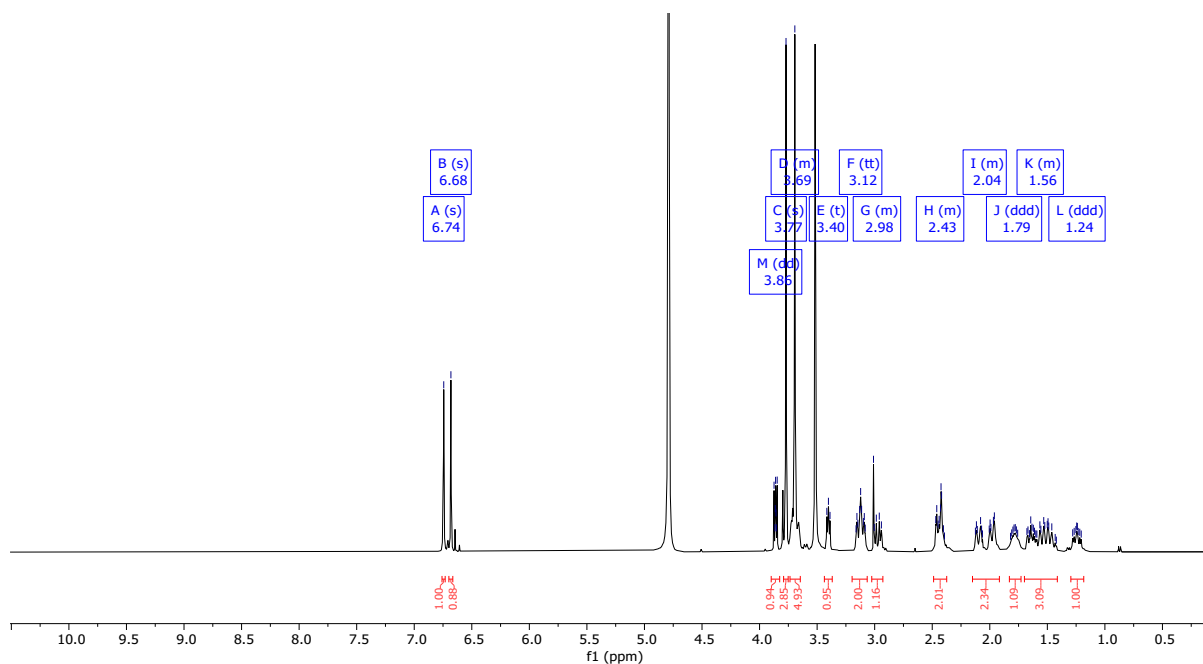

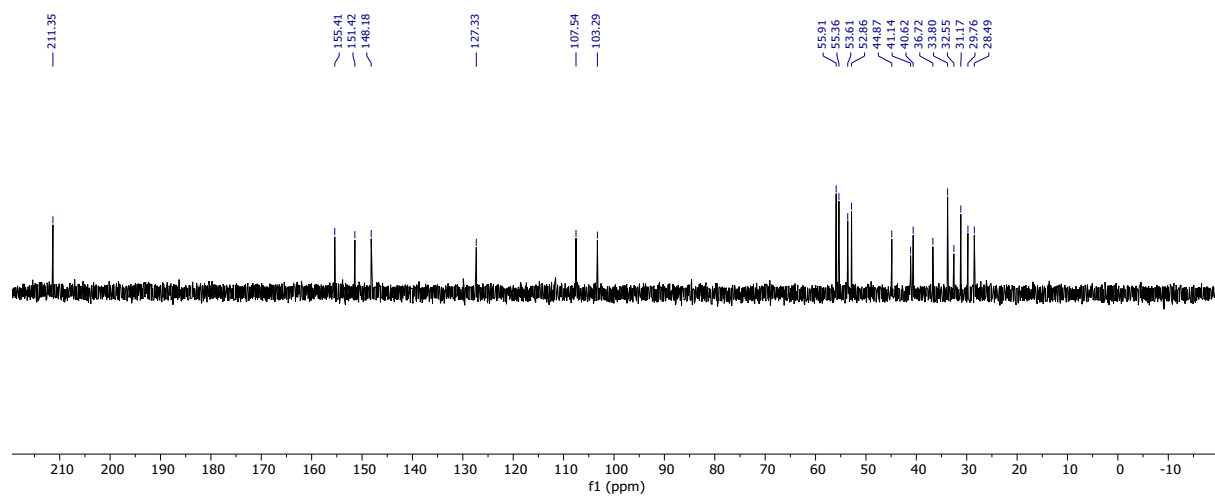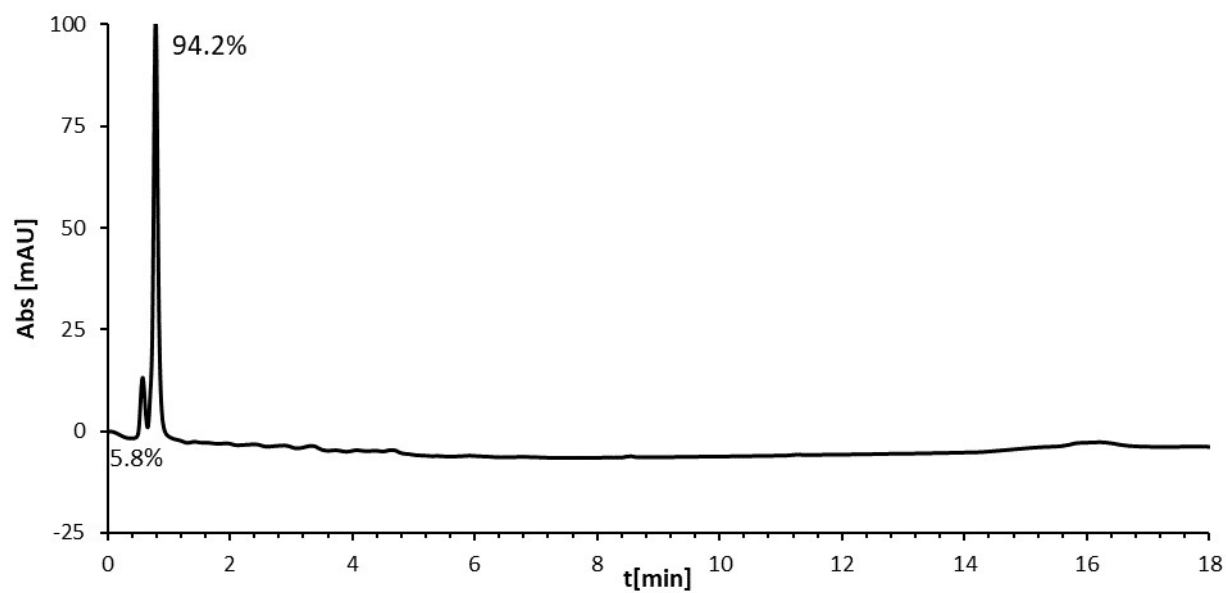



**Donepezil-(CH<sub>2</sub>)<sub>3</sub>-NH<sub>2</sub> · 2 HCl (2d)**

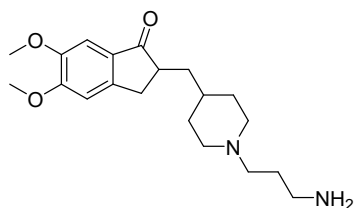

*2-((1-(3-aminopropyl)piperidin-4-yl)methyl)-5,6-dimethoxy-2,3-dihydro-1H-inden-1-one*

Obtained through the reaction of **1** with *N*-Boc-3-chloropropylamine and subsequent boc-deprotection, colourless solid (83%)

**<sup>1</sup>H NMR** (400 MHz, D<sub>2</sub>O) δ 6.43 (s, 1H), 6.33 (s, 1H), 3.53 (s, 3H), 3.45 (s, 3H), 3.30 (t, *J* = 6.4 Hz, 2H), 2.99 (dt, *J* = 28.8, 7.4 Hz, 2H), 2.85 (td, *J* = 12.9, 3.1 Hz, 2H), 2.71 – 2.57 (m, 1H), 2.16 – 1.91 (m, 2H), 1.82 – 1.66 (m, 3H), 1.54 (s, 1H), 1.41 (ddd, *J* = 13.1, 9.0, 3.7 Hz, 1H), 1.31 – 1.20 (m, 1H), 1.19 – 1.12 (m, 2H), 0.93 (ddd, *J* = 13.7, 11.2, 4.9 Hz, 1H).

**ESI [M+H]<sup>+</sup>**: 347.2260 found: 347.2270

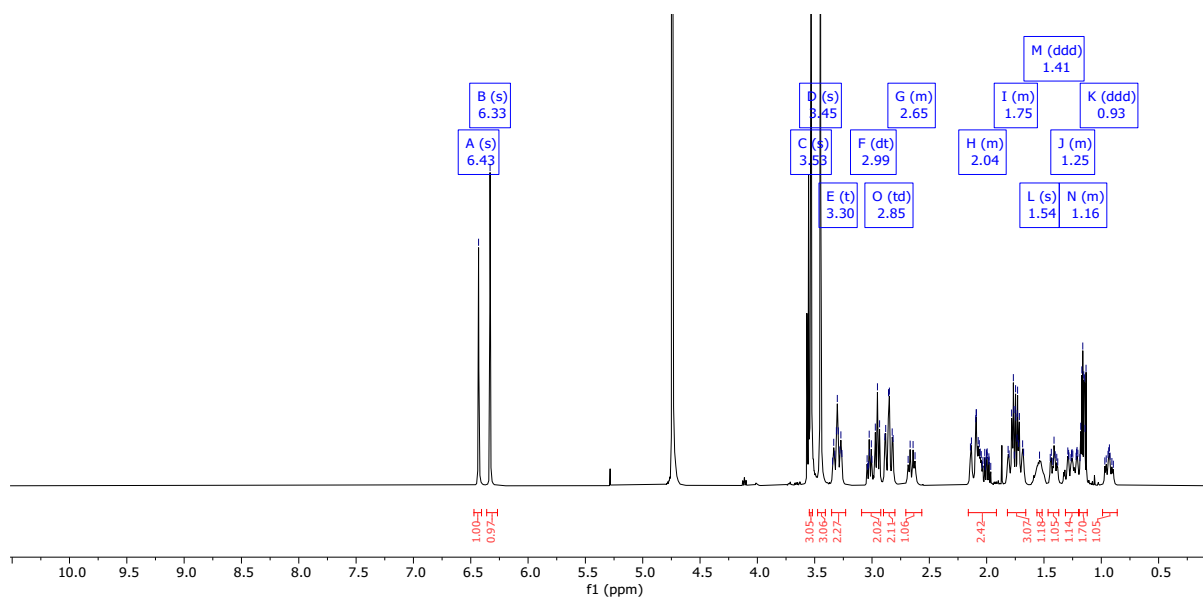

**Donepezil-(CH<sub>2</sub>)<sub>4</sub>-NH<sub>2</sub> · 2 HCl (2e)**

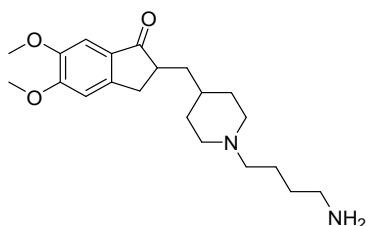

*2-((1-(4-aminobutyl)piperidin-4-yl)methyl)-5,6-dimethoxy-2,3-dihydro-1H-inden-1-one*

Obtained through the reaction of **1** with *N*-Boc-4-chlorobutylamine and subsequent boc-deprotection, colourless solid (76 %)

**<sup>1</sup>H NMR** (400 MHz, D<sub>2</sub>O) δ 6.78 (s, 1H), 6.74 (s, 1H), 3.80 (s, 3H), 3.73 (s, 3H), 3.47 (t, 2H), 3.36 – 3.17 (m, 2H), 3.12 – 2.94 (m, 4H), 2.55 – 2.38 (m, 2H), 2.08 – 1.87 (m, 4H), 1.87 – 1.72 (m, 2H), 1.68 (ddd, *J* = 12.9, 8.8, 3.8 Hz, 1H), 1.45 (dddd, *J* = 27.3, 13.7, 8.2, 3.1 Hz, 2H), 1.37 – 1.32 (m, 2H), 1.25 (ddd, *J* = 13.3, 11.0, 4.9 Hz, 1H).

**<sup>13</sup>C NMR** (101 MHz, D<sub>2</sub>O) δ 211.52, 155.44, 151.44, 148.23, 127.40, 107.55, 103.33, 55.87, 55.35, 54.35, 45.50, 44.85, 43.96, 37.01, 32.54, 31.52, 29.04, 27.62, 23.61, 22.58, 17.72, 16.25.

**ESI [M+H]<sup>+</sup>**: 361.2413 found: 361.2412

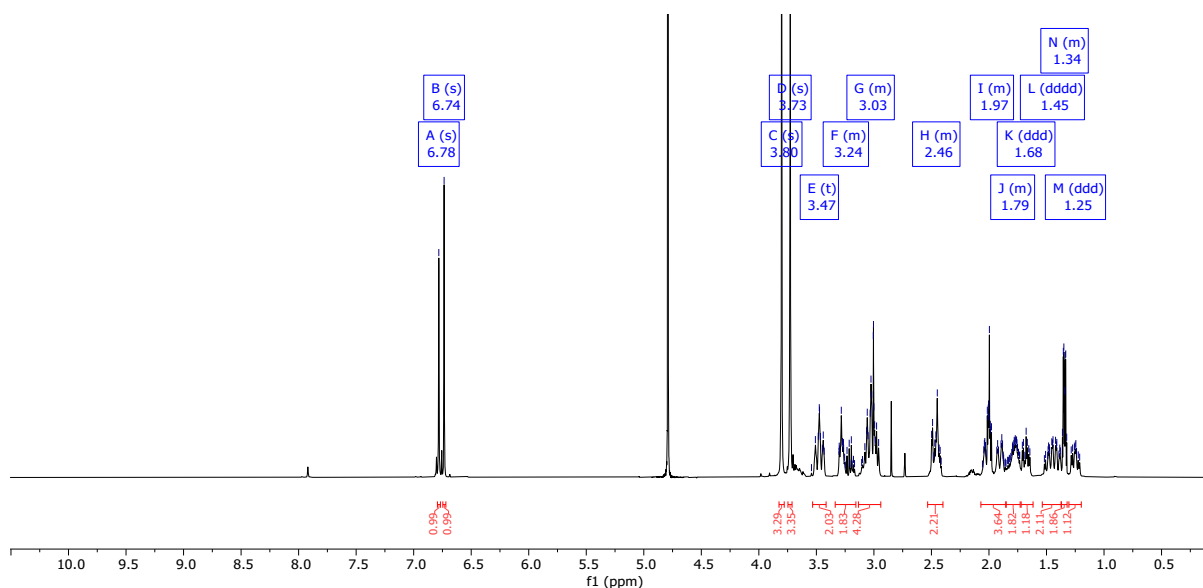

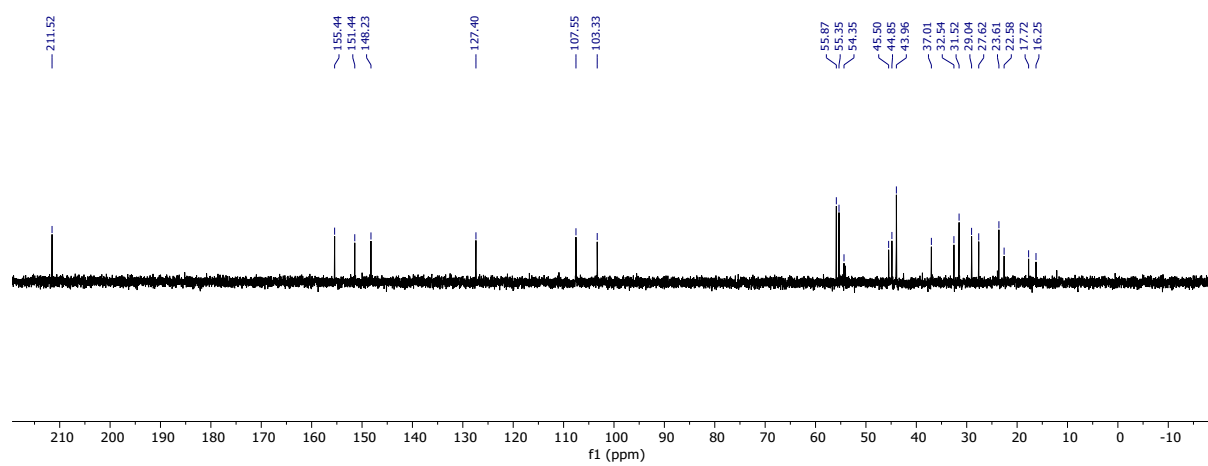

***p*-Amino-donepezil · 2 HCl (2f)**

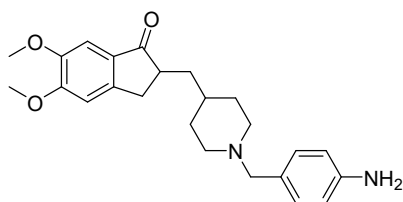

***2-((1-(4-aminobenzyl)piperidin-4-yl)methyl)-5,6-dimethoxy-2,3-dihydro-1H-inden-1-one***

Obtained through the reaction of **1** with *N*-Boc-4-aminobenzyl chloride and subsequent boc-deprotection, yellow solid (87 %)

**<sup>1</sup>H NMR** (400 MHz, D<sub>2</sub>O) δ 7.75 – 7.62 (m, 2H), 7.57 – 7.48 (m, 2H), 6.54 (s, 1H), 6.41 (s, 1H), 4.32 (s, 2H), 3.63 (s, 3H), 3.56 – 3.40 (m, 5H), 3.02 (t, 2H), 2.83 – 2.69 (m, 1H), 2.31 – 2.12 (m, 2H), 1.87 (dd, *J* = 35.6, 13.8 Hz, 2H), 1.65 (s, 2H), 1.42 (ddt, *J* = 34.9, 24.0, 10.3 Hz, 3H), 1.31 – 1.24 (m, 2H), 1.09 – 0.93 (m, 1H).

**<sup>13</sup>C NMR** (101 MHz, D<sub>2</sub>O) δ 210.41, 154.82, 150.71, 147.64, 132.80, 132.40, 130.98, 129.61, 126.73, 123.68, 107.03, 102.58, 59.28, 55.62, 55.58, 54.97, 54.92, 54.19, 53.70, 52.21, 44.45, 36.35, 32.28, 31.12, 29.29, 27.95, 26.99, 17.58, 16.10.

**ESI [M+2H]<sup>+</sup>**: 396.2326 found: 396.2329

**Purity:** 90.8%

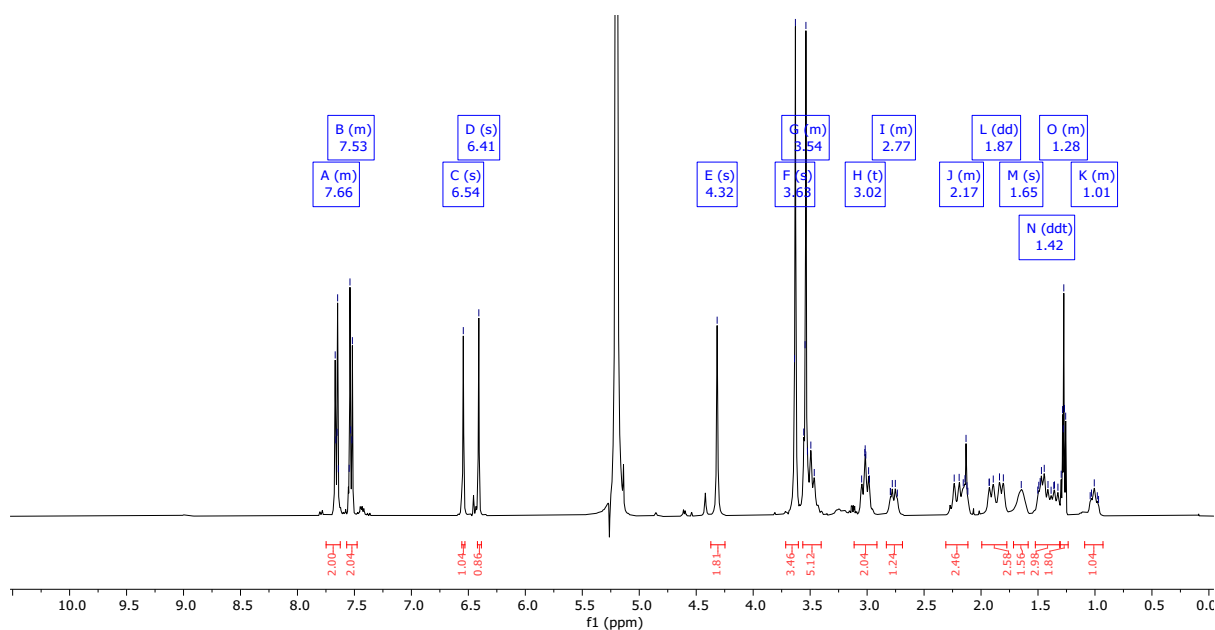

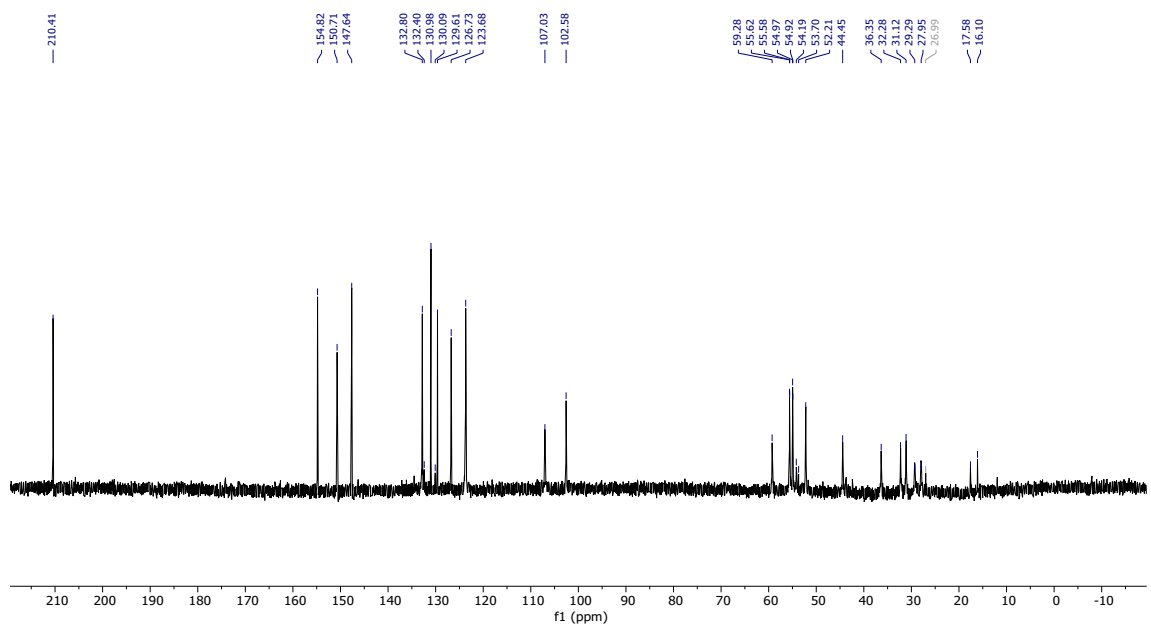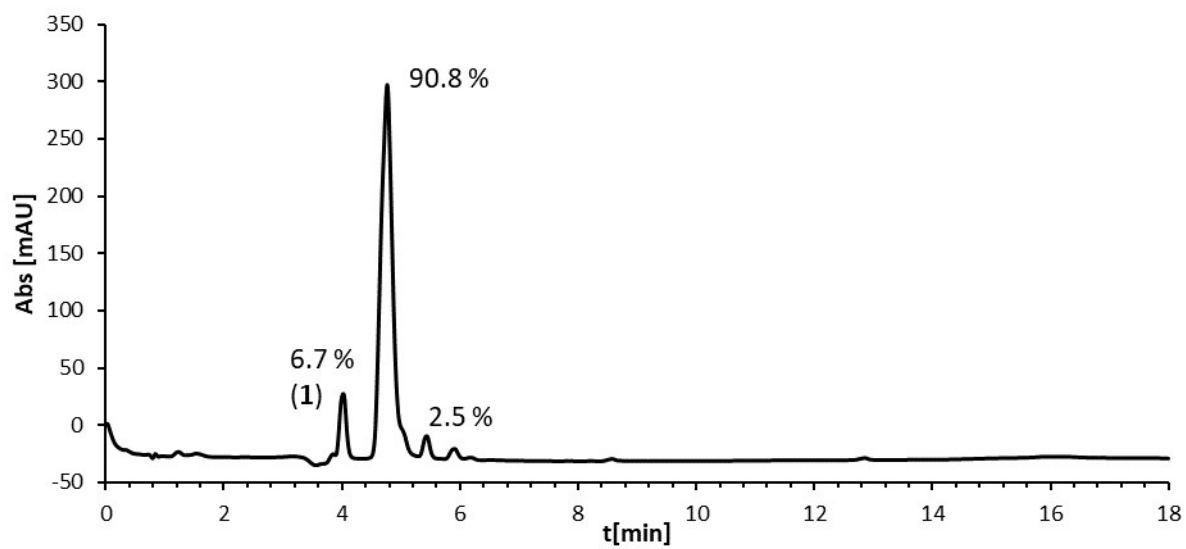

***m*-Amino-donepezil · 2 HCl (2g)**

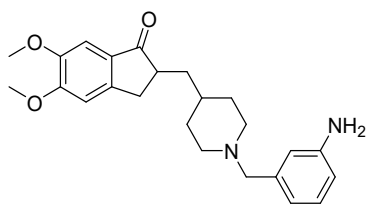

***2-((1-(3-aminobenzyl)piperidin-4-yl)methyl)-5,6-dimethoxy-2,3-dihydro-1H-inden-1-one***

Obtained through the reaction of **1** with *N*-Boc-3-aminobenzyl chloride and subsequent boc-deprotection, yellow solid (92 %)

**<sup>1</sup>H NMR** (400 MHz, D<sub>2</sub>O) δ 7.69 – 7.58 (m, 2H), 7.57 – 7.52 (m, 2H), 6.87 (s, 1H), 6.83 (s, 1H), 4.38 (s, 2H), 3.83 (s, 3H), 3.75 (s, 3H), 3.56 (t, *J* = 14.0 Hz, 2H), 3.15 – 2.99 (m, 3H), 2.63 – 2.45 (m, 2H), 2.09 – 1.89 (m, 2H), 1.78 (dd, *J* = 7.9, 4.2 Hz, 1H), 1.67 (ddd, *J* = 12.9, 8.6, 3.8 Hz, 1H), 1.56 – 1.37 (m, 2H), 1.36 – 1.24 (m, 1H).

**<sup>13</sup>C NMR** (101 MHz, D<sub>2</sub>O) δ 211.31, 155.44, 151.39, 148.23, 132.11, 131.10, 130.90, 130.60, 127.85, 127.37, 125.79, 124.84, 107.58, 103.34, 62.97, 59.72, 55.94, 55.40, 52.62, 44.93, 36.77, 32.57, 31.42, 29.67, 28.41.

**ESI [M+H]<sup>+</sup>**: 395.2330 found: 395.2330

**Purity:** 95.3 %

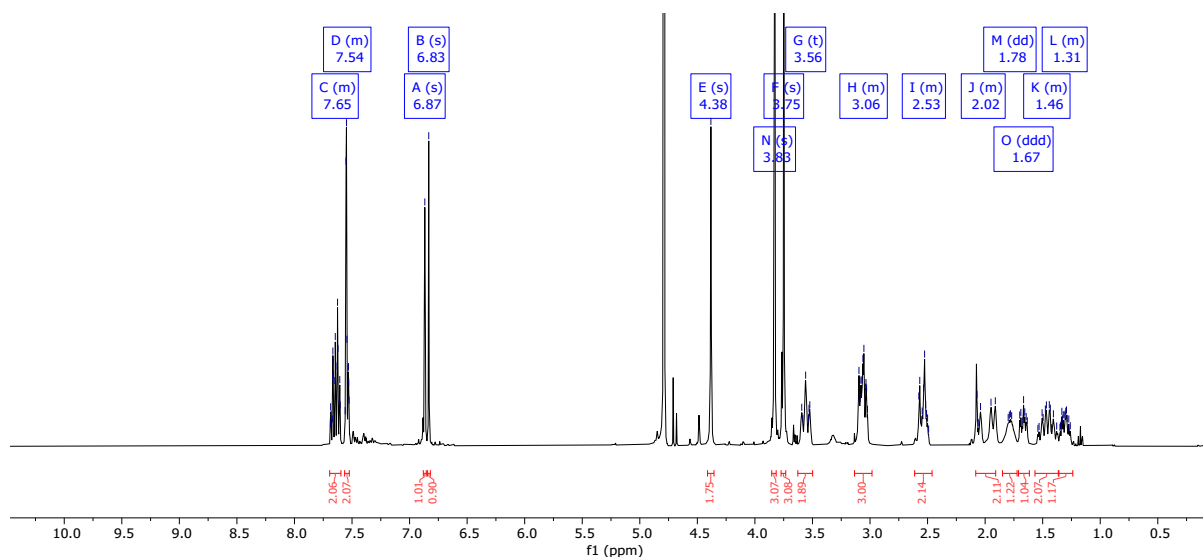

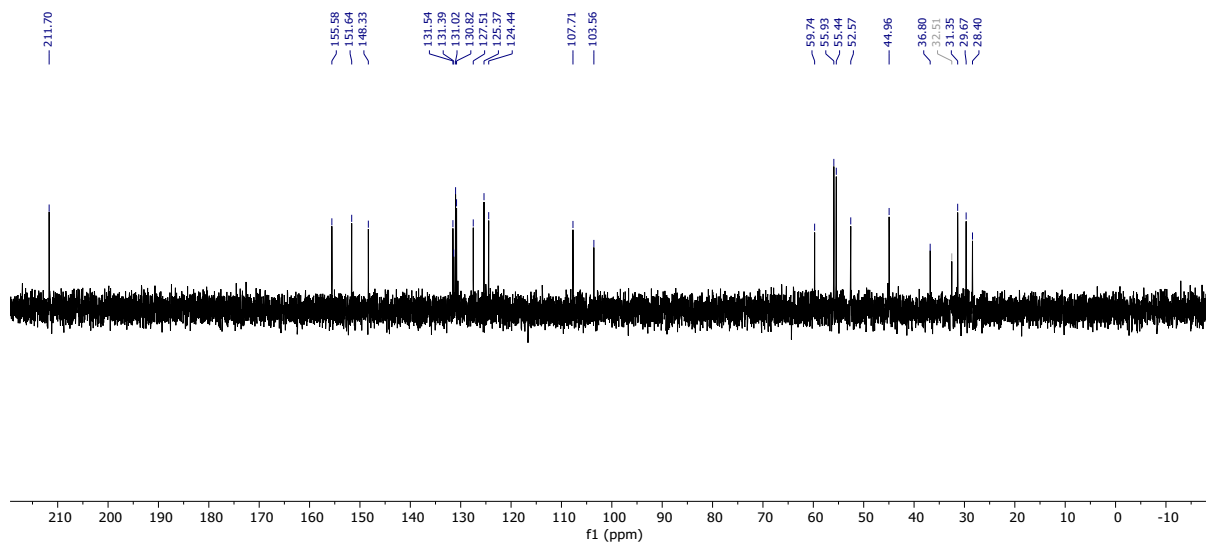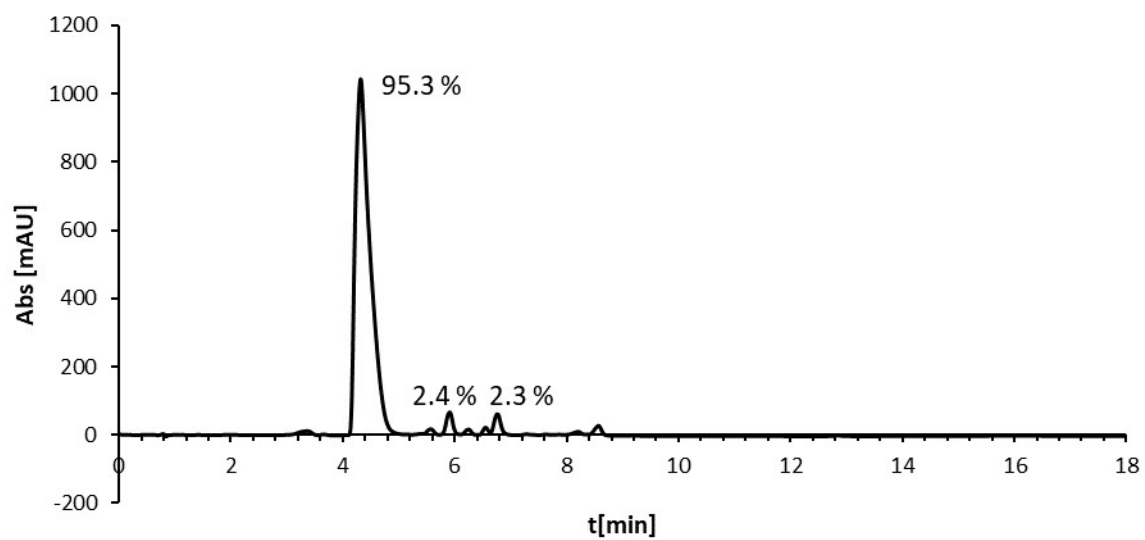

***p*-Aminomethyl donepezil · 2 HCl (2h)**

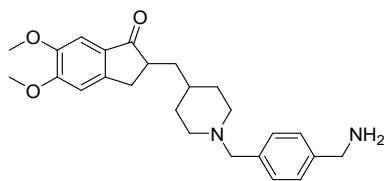

***2-((1-(4-(aminomethyl)benzyl)piperidin-4-yl)methyl)-5,6-dimethoxy-2,3-dihydro-1H-inden-1-one***

Obtained through the reaction of **1** with 4-cyanobenzyl chloride and subsequent reduction with hydrogen, colorless solid (83 %)

**<sup>1</sup>H NMR** (400 MHz, D<sub>2</sub>O)  $\delta$  7.53 – 7.31 (m, 4H), 6.46 (s, 1H), 6.33 (s, 1H), 4.14 (s, 2H), 4.06 (s, 2H), 3.52 (s, 3H), 3.43 (s, 3H), 3.36 (t,  $J$  = 13.0 Hz, 2H), 2.86 (t,  $J$  = 12.7 Hz, 2H), 2.67 (dd,  $J$  = 17.4, 6.9 Hz, 1H), 2.24 – 1.96 (m, 2H), 1.75 (dd,  $J$  = 38.5, 13.8 Hz, 2H), 1.52 (s, 1H), 1.42 – 1.14 (m, 3H), 1.00 – 0.80 (m, 1H).

**<sup>13</sup>C NMR** (101 MHz, D<sub>2</sub>O)  $\delta$  211.47, 155.44, 151.48, 148.21, 139.34, 133.56, 131.92, 131.60, 130.45, 130.06, 129.71, 129.60, 129.27, 129.06, 127.37, 125.63, 107.59, 103.35, 60.17, 55.89, 55.35, 52.48, 44.89, 43.00, 42.68, 36.75, 32.52, 31.38, 29.65, 28.35, 20.30.

**ESI [M+H]<sup>+</sup>**: 409.2481 found: 409.2486

**Purity**: 91.8%

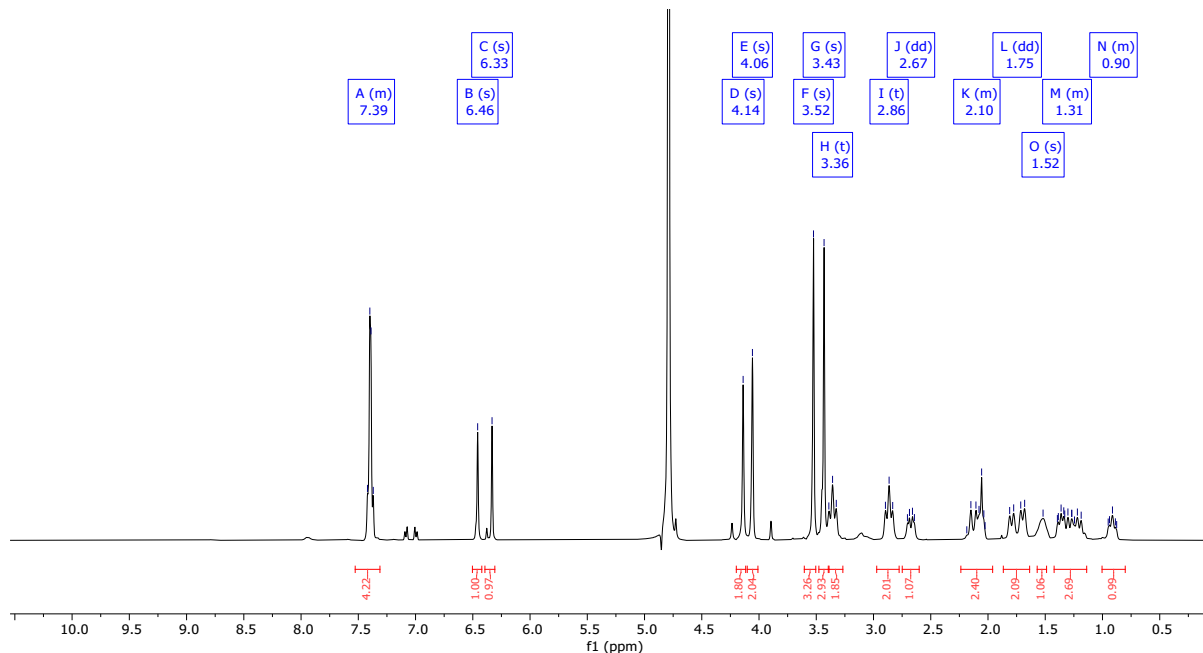



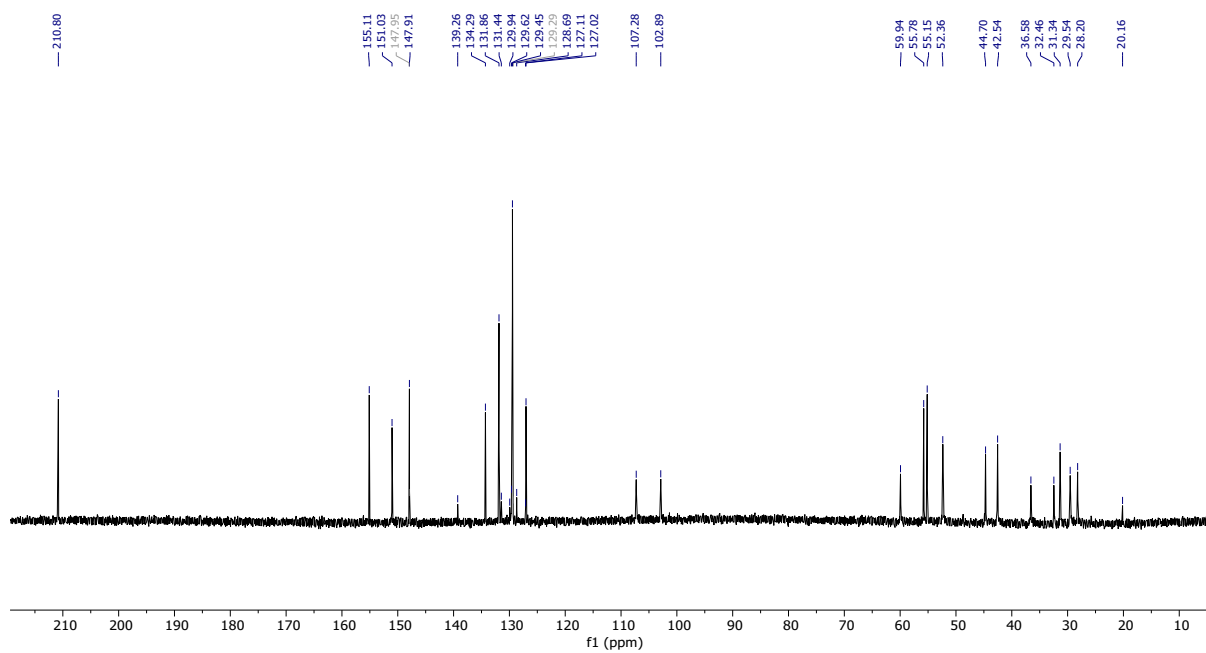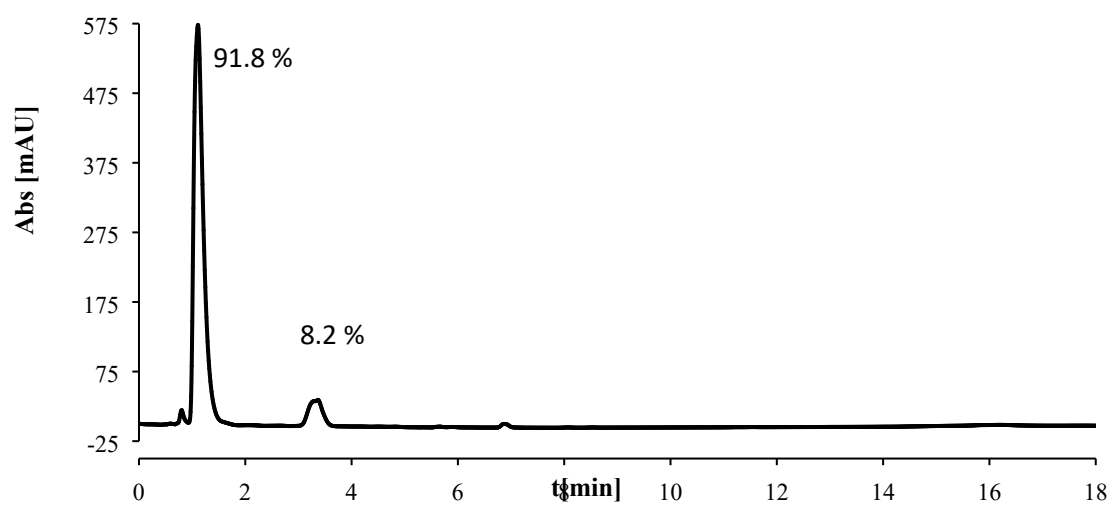

***m*-Aminomethyl donepezil · 2 HCl (2i)**

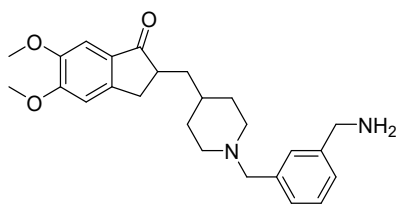

***2-((1-(3-(aminomethyl)benzyl)piperidin-4-yl)methyl)-5,6-dimethoxy-2,3-dihydro-1H-inden-1-one***

Obtained through the reaction of **1** with 3-cyanobenzyl chloride and subsequent reduction with hydrogen, colorless solid (78 %)

**<sup>1</sup>H NMR** (400 MHz, D<sub>2</sub>O)  $\delta$  7.58 – 7.47 (m, 4H), 6.58 (s, 1H), 6.46 (s, 1H), 4.28 (s, 2H), 4.19 (s, 2H), 3.64 (s, 3H), 3.56 (s, 3H), 3.48 (t,  $J$  = 13.3 Hz, 2H), 2.99 (t,  $J$  = 3.1 Hz, 2H), 2.86 – 2.71 (m, 1H), 2.37 – 2.14 (m, 3H), 1.87 (dd,  $J$  = 40.4, 14.0 Hz, 2H), 1.72 – 1.61 (m, 1H), 1.54 – 1.26 (m, 3H), 1.06 (t, 1H).

**<sup>13</sup>C NMR** (101 MHz, D<sub>2</sub>O)  $\delta$  210.96, 155.20, 151.15, 148.00, 139.22, 133.51, 132.42, 131.93, 131.62, 130.47, 130.03, 129.66, 129.57, 129.25, 128.99, 127.12, 125.62, 107.36, 102.97, 60.13, 55.84, 55.22, 52.46, 44.79, 43.94, 42.98, 42.69, 36.67, 32.54, 31.40, 29.63, 28.29, 20.32.

**ESI [M+H]<sup>+</sup>**: 409.248 found: 409.249

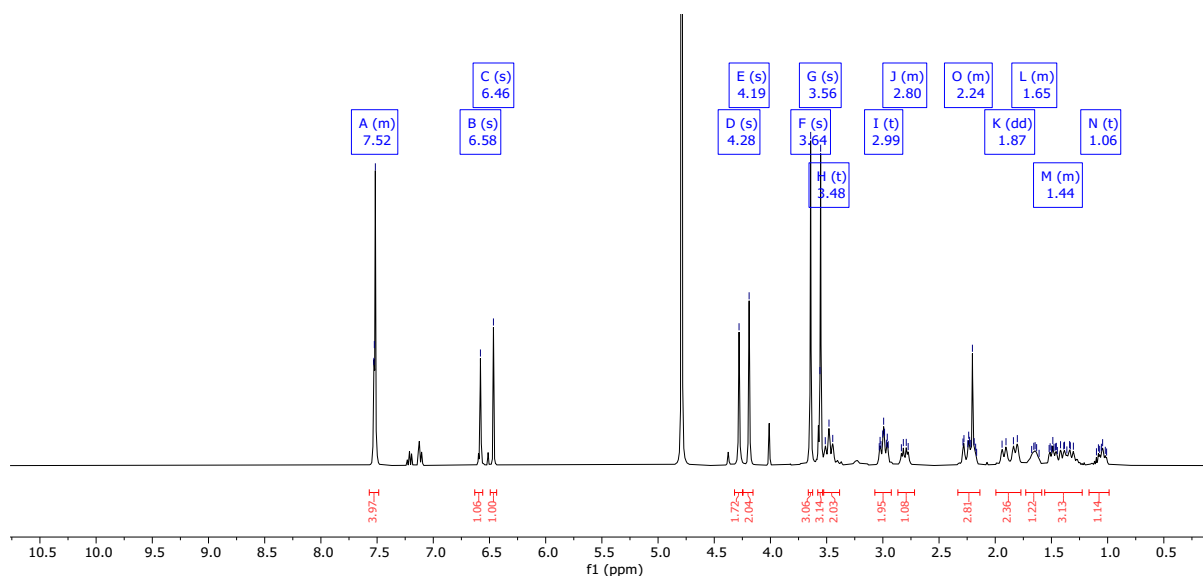

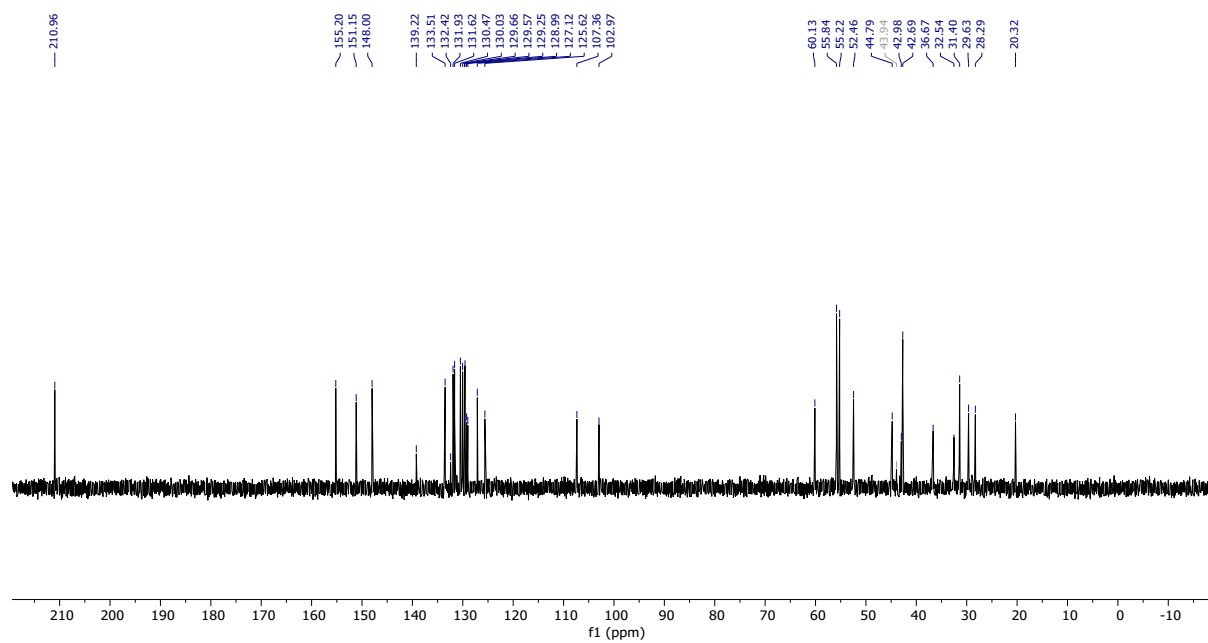

***m*-Benzamide donepezil · HCl (2j)**

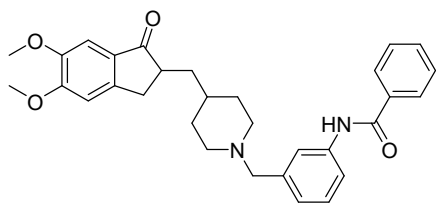

*N*-(3-((4-((5,6-dimethoxy-1-oxo-2,3-dihydro-1H-inden-2-yl)methyl)piperidin-1-yl)methyl)phenyl) benzamide

*m*-Amino donepezil (**2g**) and triethylamine (6 eq.) were dissolved in chloroform and benzoyl chloride (2 eq.) was added dropwise. The reaction mixture was stirred overnight at room temperature, before 0.1 M NaOH was added to hydrolyse unreacted acid chloride. The organic phase was washed 2x with 0.1 M NaOH, 0.1 M HCl and 3x with brine. Removal of the solvent under reduced pressure yielded **2j** as a colourless solid (78 %).

**<sup>1</sup>H NMR** (400 MHz, CDCl<sub>3</sub>) δ 8.11 (s, 1H), 7.96 – 7.88 (m, 2H), 7.70 (d, *J* = 9.4 Hz, 1H), 7.65 – 7.26 (m, 5H), 7.18 (s, 1H), 7.13 (dt, *J* = 7.5, 1.3 Hz, 1H), 6.88 (s, 1H), 3.98 (s, 3H), 3.91 (s, 3H), 3.54 (s, 2H), 3.25 (dd, *J* = 17.5, 8.0 Hz, 1H), 3.03 – 2.87 (m, 2H), 2.79 – 2.59 (m, 2H), 2.05 (ddd, *J* = 11.6, 4.8, 2.7 Hz, 1H), 1.95 – 1.81 (m, 1H), 1.80 – 1.63 (m, 2H), 1.59 – 1.49 (m, 1H), 1.46 – 1.18 (m, 3H).

**<sup>13</sup>C NMR** (101 MHz, CDCl<sub>3</sub>) δ 207.14, 166.25, 155.67, 149.53, 148.72, 139.17, 134.53, 132.82, 131.92, 131.13, 129.56, 129.52, 128.96, 128.64, 128.31, 127.51, 126.56, 126.23, 122.63, 121.57, 107.39, 104.29, 77.40, 77.28, 77.08, 76.76, 61.04, 60.96, 56.28, 56.09, 52.41, 44.64, 37.83, 33.62, 32.45, 29.47, 28.32, 14.33.

**ESI [M+H]<sup>+</sup>**: 499.2591 found: 499.2591

**Purity:** 94.9%

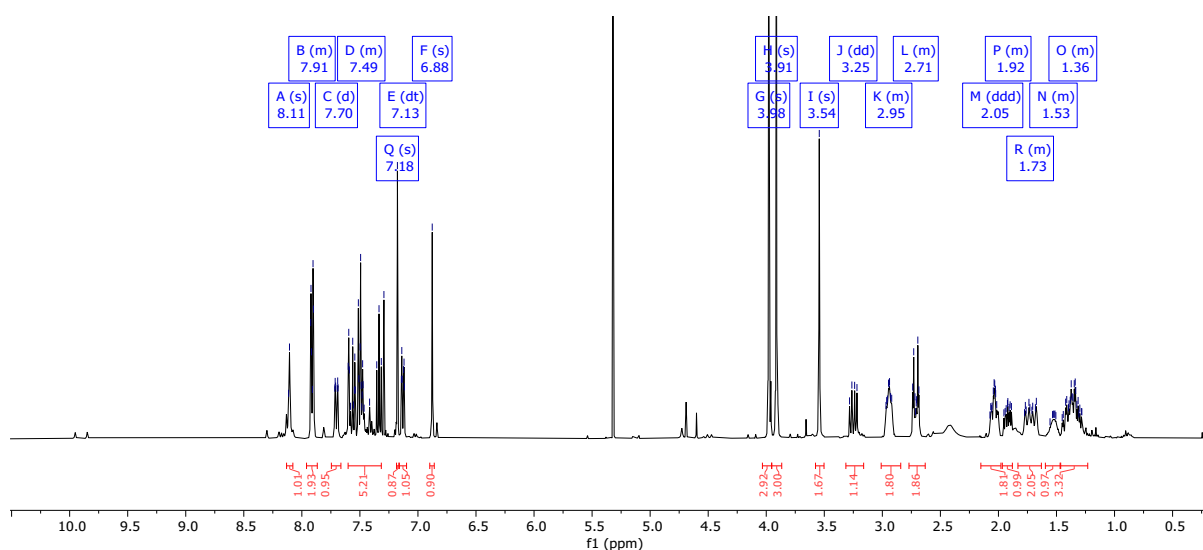

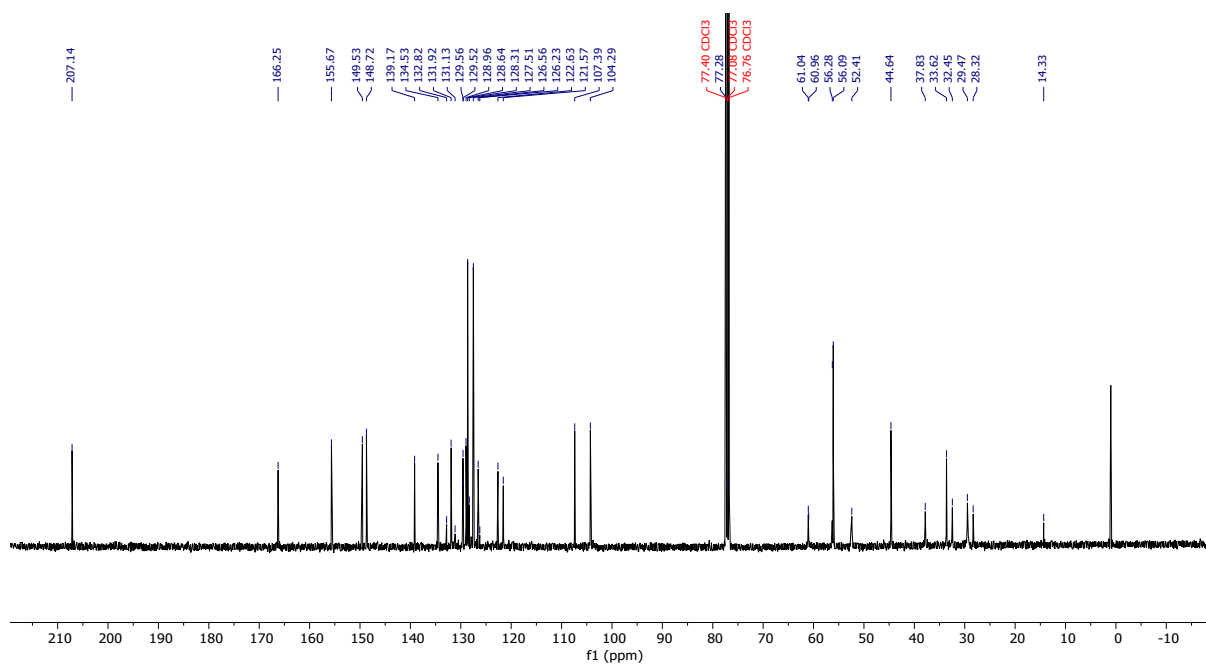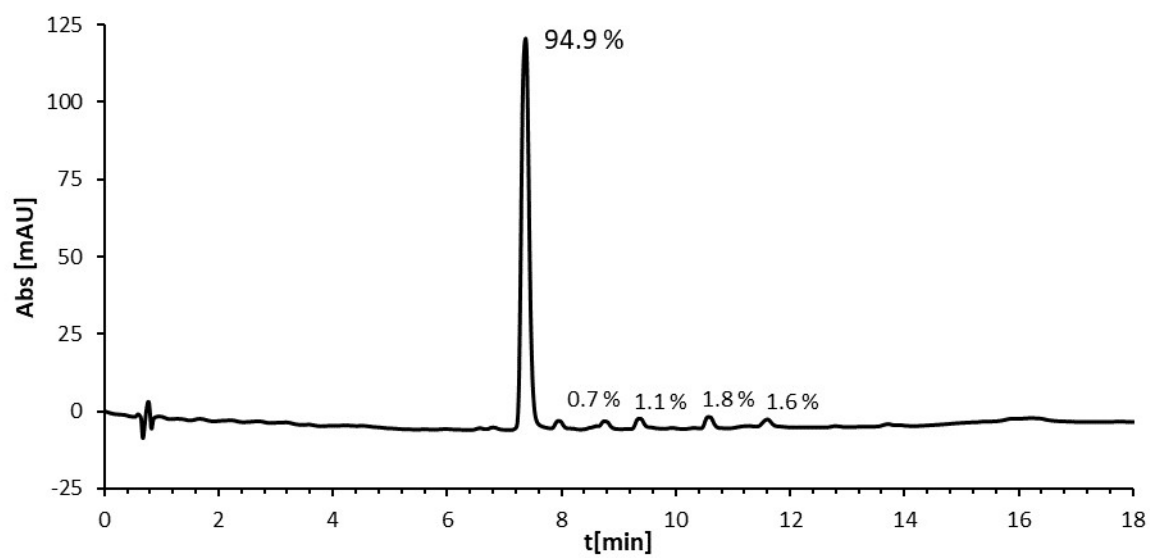

***p*-Carboxy donepezil · N(Et)<sub>3</sub> (2k)**

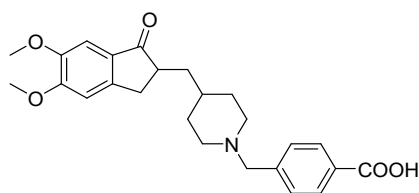

*4-((4-((5,6-dimethoxy-1-oxo-2,3-dihydro-1H-inden-2-yl)methyl)piperidin-1-yl)methyl)benzoic acid*

Obtained through the reaction of **1** with 4-(bromomethyl)benzoic acid and subsequent extraction with 0.1 M NH<sub>3</sub>, yellow solid (54 %)

**<sup>1</sup>H NMR** (400 MHz, DMSO) δ 7.90 (d, J = 8.3 Hz, 2H), 7.43 (d, J = 8.3 Hz, 2H), 7.06 (d, J = 14.5 Hz, 2H), 3.85 (s, 3H), 3.78 (s, 3H), 3.60 (s, 2H), 3.27 – 3.15 (m, 2H), 3.06 (q, J = 7.3 Hz, 6H), 2.84 (t, J = 10.8 Hz, 2H), 2.64 (dq, J = 13.5, 4.5 Hz, 2H), 2.05 (t, J = 11.4 Hz, 2H), 1.79 – 1.59 (m, 3H), 1.30 (t, J = 7.2 Hz, 1H), 1.18 (t, J = 7.3 Hz, 9H).

**<sup>13</sup>C NMR** (101 MHz, DMSO) δ 207.14, 172.70, 168.59, 155.68, 149.54, 149.23, 142.87, 129.59, 129.02, 108.63, 104.36, 62.43, 56.39, 56.04, 53.68, 45.81, 39.92, 34.18, 33.12, 31.71, 21.74.

**Purity:** 91.2%

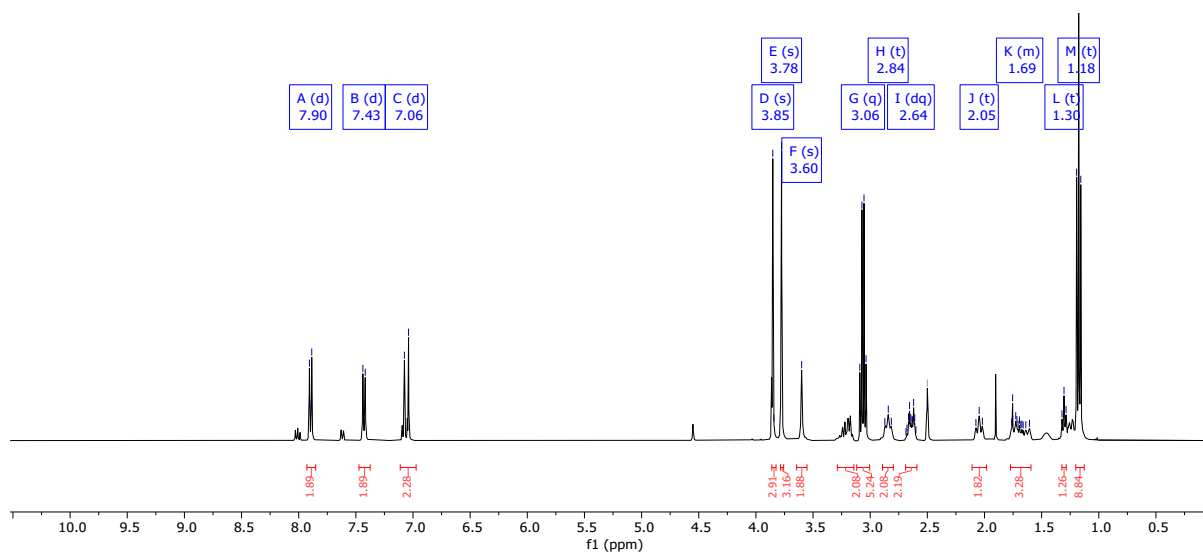

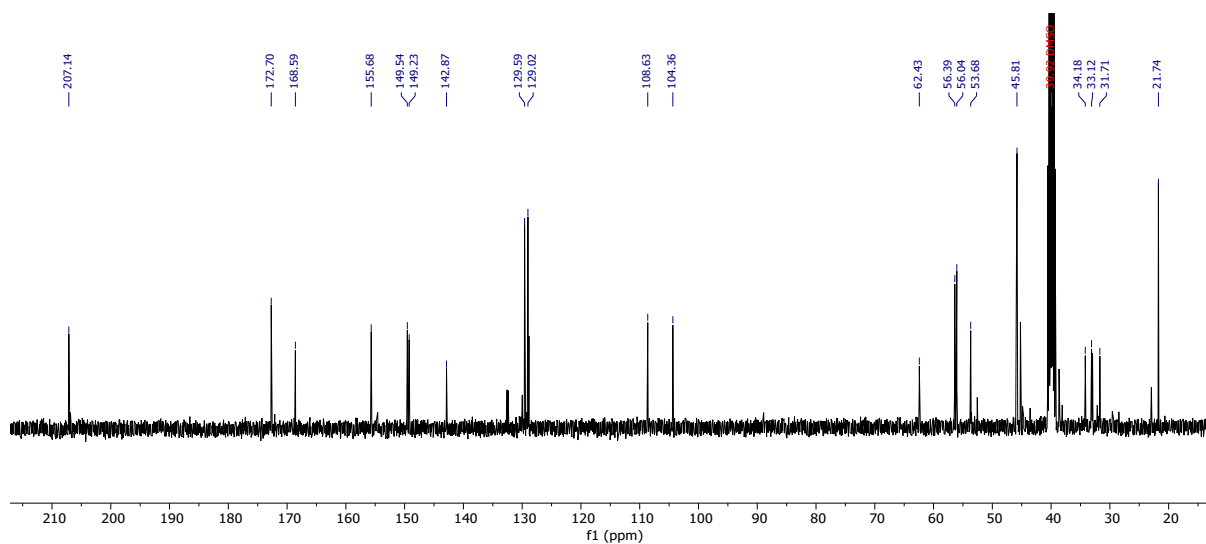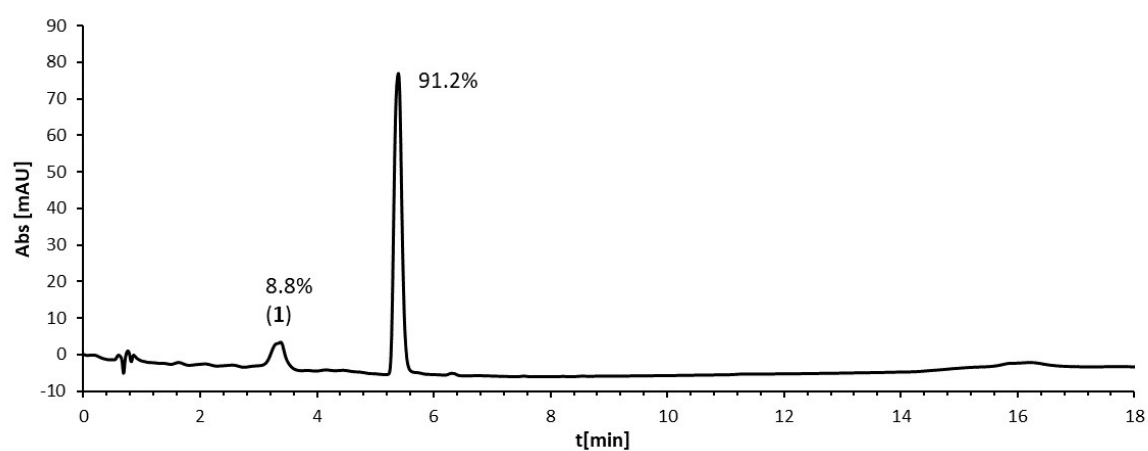

## Piperidine 4-methyl phthalimide · HCl (5a)

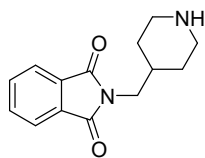

### *2-(piperidin-4-ylmethyl)isoindoline-1,3-dione*

A solution of 150 mg of phthalic anhydride (1.01 mmol) and 4-(aminomethyl)piperidine dissolved in 0.5 ml of acetonitrile was slowly heated to 150° C while stirring. Upon evaporation of the solvent and the reaction mixture reaching the melting point of phthalic anhydride, the obtained orange liquid is kept at 150° C for another hour. After cooling to room temperature, the residue was dissolved in 3 ml of methanol and the solvent was subsequently removed under reduced pressure to obtain the product as a yellow solid.

**<sup>1</sup>H NMR** (400 MHz, CDCl<sub>3</sub>)  $\delta$  7.80 – 7.75 (m, 2H), 7.75 – 7.71 (m, 2H), 3.52 (dd,  $J$  = 7.0, 2.7 Hz, 2H), 3.25 (d,  $J$  = 12.2 Hz, 2H), 2.78 (q,  $J$  = 12.6 Hz, 3H), 2.08 – 1.90 (m, 2H), 1.78 (d,  $J$  = 14.0 Hz, 2H), 1.53 (q,  $J$  = 13.2 Hz, 2H).

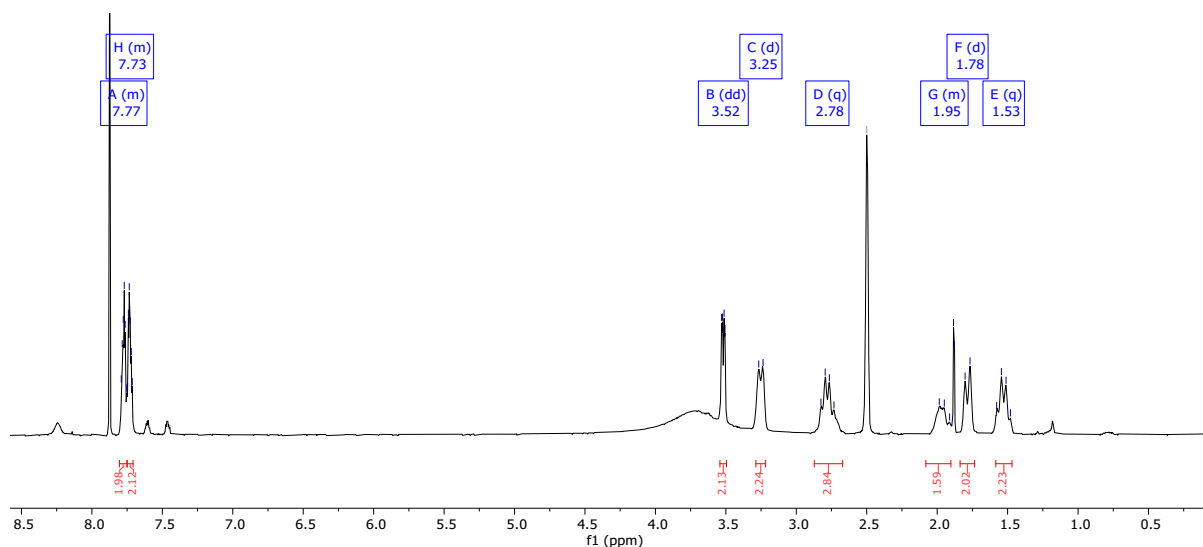



## Piperidine 4-ethyl phthalimide · HCl (5b)

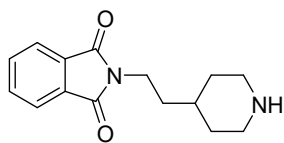

### 2-(2-(piperidin-4-yl)ethyl)isoindoline-1,3-dione

According to the protocol outlined in 5a using 4-(aminoethyl)piperidine

**<sup>1</sup>H NMR** (400 MHz, CDCl<sub>3</sub>) δ 7.72 (dd, *J* = 5.4, 3.1 Hz, 2H), 7.63 (dd, *J* = 5.5, 3.0 Hz, 2H), 3.61 (t, *J* = 6.9 Hz, 2H), 3.28 (d, *J* = 12.0 Hz, 2H), 2.73 (t, *J* = 12.2 Hz, 2H), 1.92 (d, *J* = 10.6 Hz, 2H), 1.57 (q, *J* = 6.6 Hz, 2H), 1.46 – 1.36 (m, 3H).

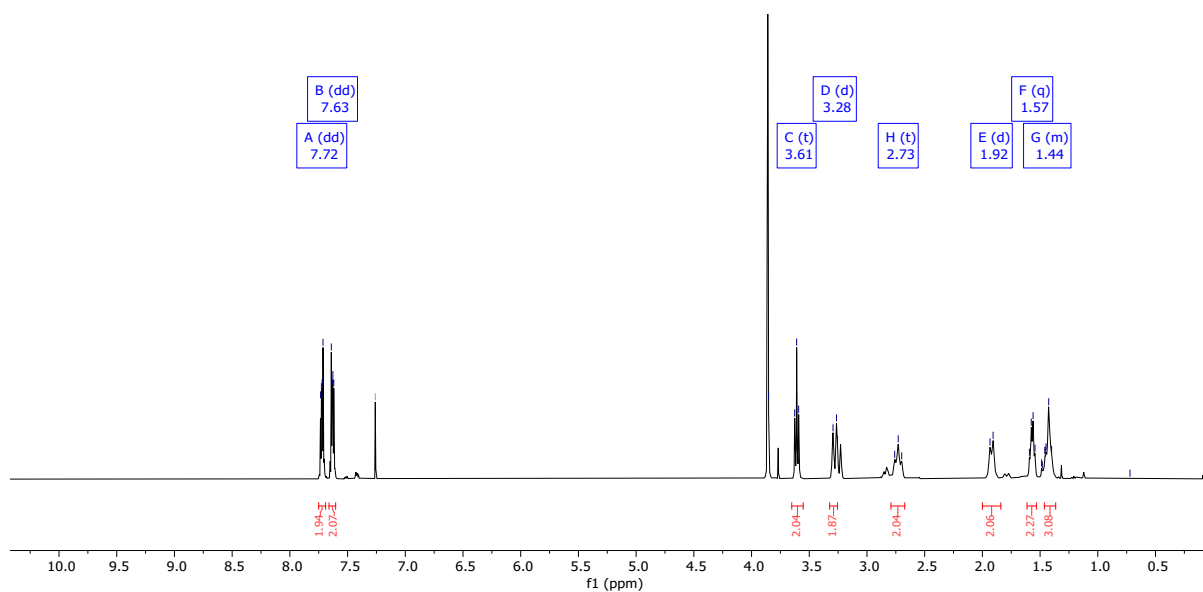

**Benzyl-piperidine 4-methyl phthalimide · HCl (6a)**

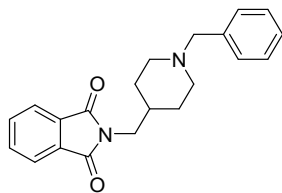

*2-((1-benzylpiperidin-4-yl)methyl)isoindoline-1,3-dione*

Obtained through the reaction of **5a** with benzyl bromide, colorless solid (64 %)

**<sup>1</sup>H NMR** (400 MHz, D<sub>2</sub>O)  $\delta$  7.50 – 7.22 (m, 9H), 4.19 – 4.05 (m, 2H), 3.54 – 3.23 (m, 3H), 3.14 – 2.99 (m, 2H), 2.85 (m, 3H), 1.98 – 1.64 (m, 5H), 1.32 (t,  $J$  = 14.3 Hz, 2H)

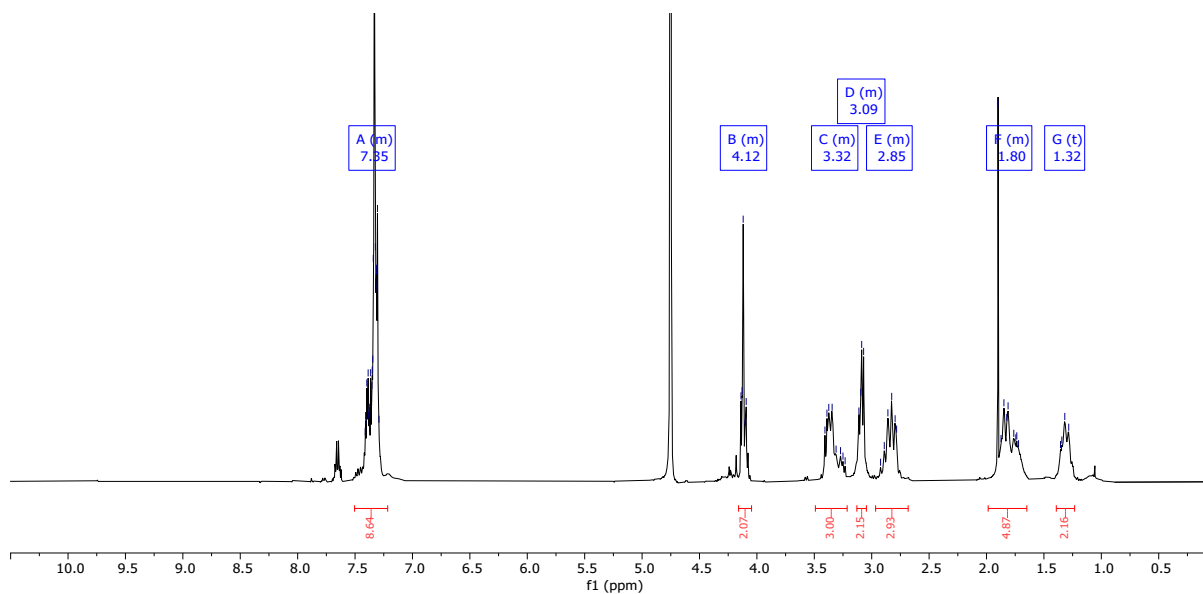

#### 4-Amino benzyl-piperidine 4-methyl phthalimide · 2 HCl (6b)

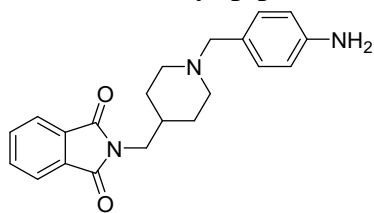

#### 2-((1-(4-aminobenzyl)piperidin-4-yl)methyl)isoindoline-1,3-dione

Obtained through the reaction of **5a** with *N*-Boc-4-aminobenzyl chloride and subsequent boc-deprotection, orange solid (54 %)

**<sup>1</sup>H NMR** (400 MHz, D<sub>2</sub>O) δ 7.94 – 7.77 (m, 3H), 7.61 – 7.52 (m, 2H), 7.34 (ddd, *J* = 8.6, 4.8, 2.2 Hz, 2H), 4.33 (d, *J* = 17.6 Hz, 2H), 3.71 – 3.38 (m, 5H), 3.21 – 2.84 (m, 5H), 2.19 – 1.93 (m, 5H), 1.54 (t, *J* = 13.0 Hz, 3H).

**ESI [M+H]<sup>+</sup>**: 350.1863, found: 350.1863

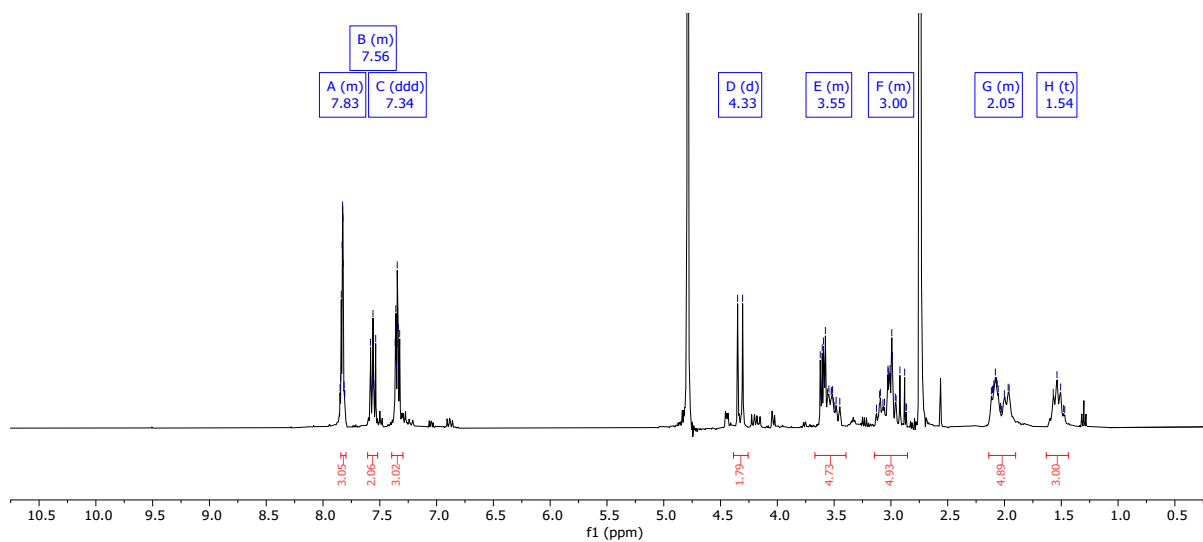

## Benzyl-piperidine 4-ethyl phthalimide · HCl (6c)

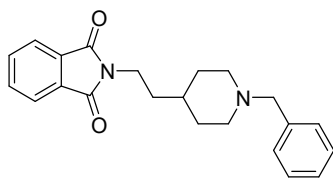

### 2-(2-(1-benzylpiperidin-4-yl)ethyl)isoindoline-1,3-dione

Obtained through the reaction of **5b** with benzyl bromide, colorless solid (86 %)

**<sup>1</sup>H NMR** (400 MHz, MeOD)  $\delta$  7.94 – 7.75 (m, 4H), 7.64 – 7.54 (m, 2H), 7.51 – 7.45 (m, 3H), 4.30 (s, 2H), 3.72 (t,  $J$  = 6.8 Hz, 2H), 3.55 – 3.46 (m, 2H), 3.00 (td,  $J$  = 12.6, 2.8 Hz, 2H), 2.09 (d,  $J$  = 13.5 Hz, 2H), 1.73 – 1.47 (m, 5H).

**<sup>13</sup>C NMR** (101 MHz, MeOD)  $\delta$  171.13, 135.71, 134.52, 132.12, 132.09, 131.08, 130.16, 129.60, 124.18, 61.55, 53.28, 36.09, 34.56, 31.71, 29.75.

ESI [M+H]<sup>+</sup>: 349.1911, found: 349.1911

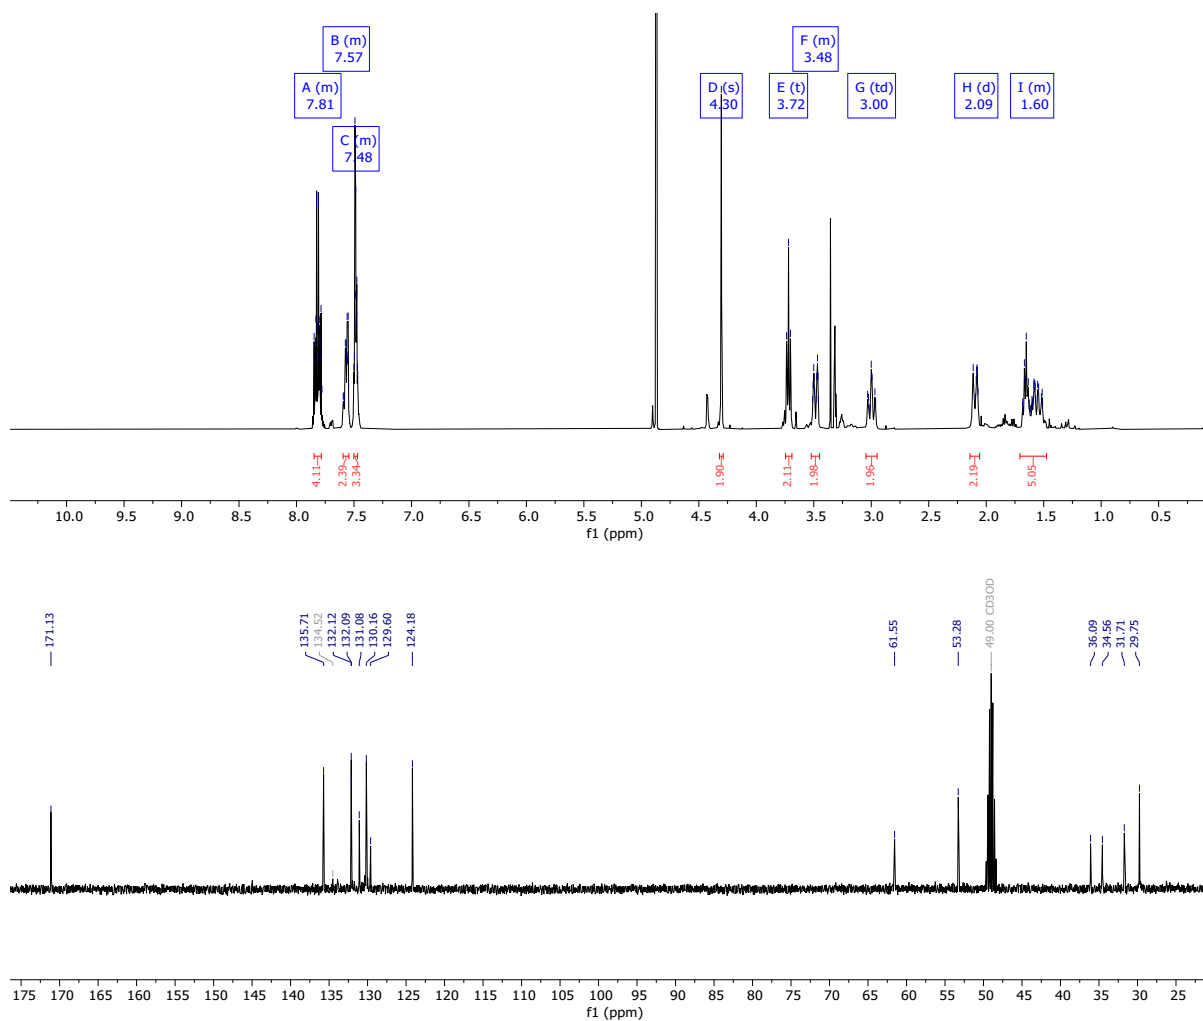

## Benzoyl-piperidine 4-ethyl phthalimide (6d)

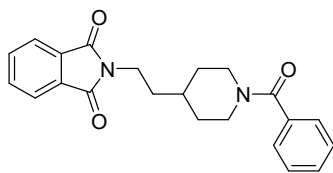

### *2-(2-(1-benzoylpiperidin-4-yl)ethyl)isoindoline-1,3-dione*

Obtained through the reaction of **5b** with benzoyl chloride, yellow solid (85 %)

**<sup>1</sup>H NMR** (400 MHz, CDCl<sub>3</sub>) δ 7.86 (dd, *J* = 5.4, 3.1 Hz, 2H), 7.73 (dd, *J* = 5.5, 3.0 Hz, 2H), 7.40 (s, 5H), 4.72 (s, 1H), 3.75 (t, *J* = 7.1 Hz, 2H), 3.13 – 2.62 (m, 3H), 2.08 – 1.54 (m, 4H), 1.38 – 1.07 (m, 3H).

**<sup>13</sup>C NMR** (101 MHz, CDCl<sub>3</sub>) δ 170.35, 168.41, 136.29, 134.01, 132.09, 129.50, 128.45, 126.84, 123.26, 77.37, 77.06, 76.74, 35.48, 35.03, 33.75, 31.91, 27.23, 27.18, 25.52, 22.69, 14.13.

**ESI [M+Na]:** 385.1523, found: 385.1523

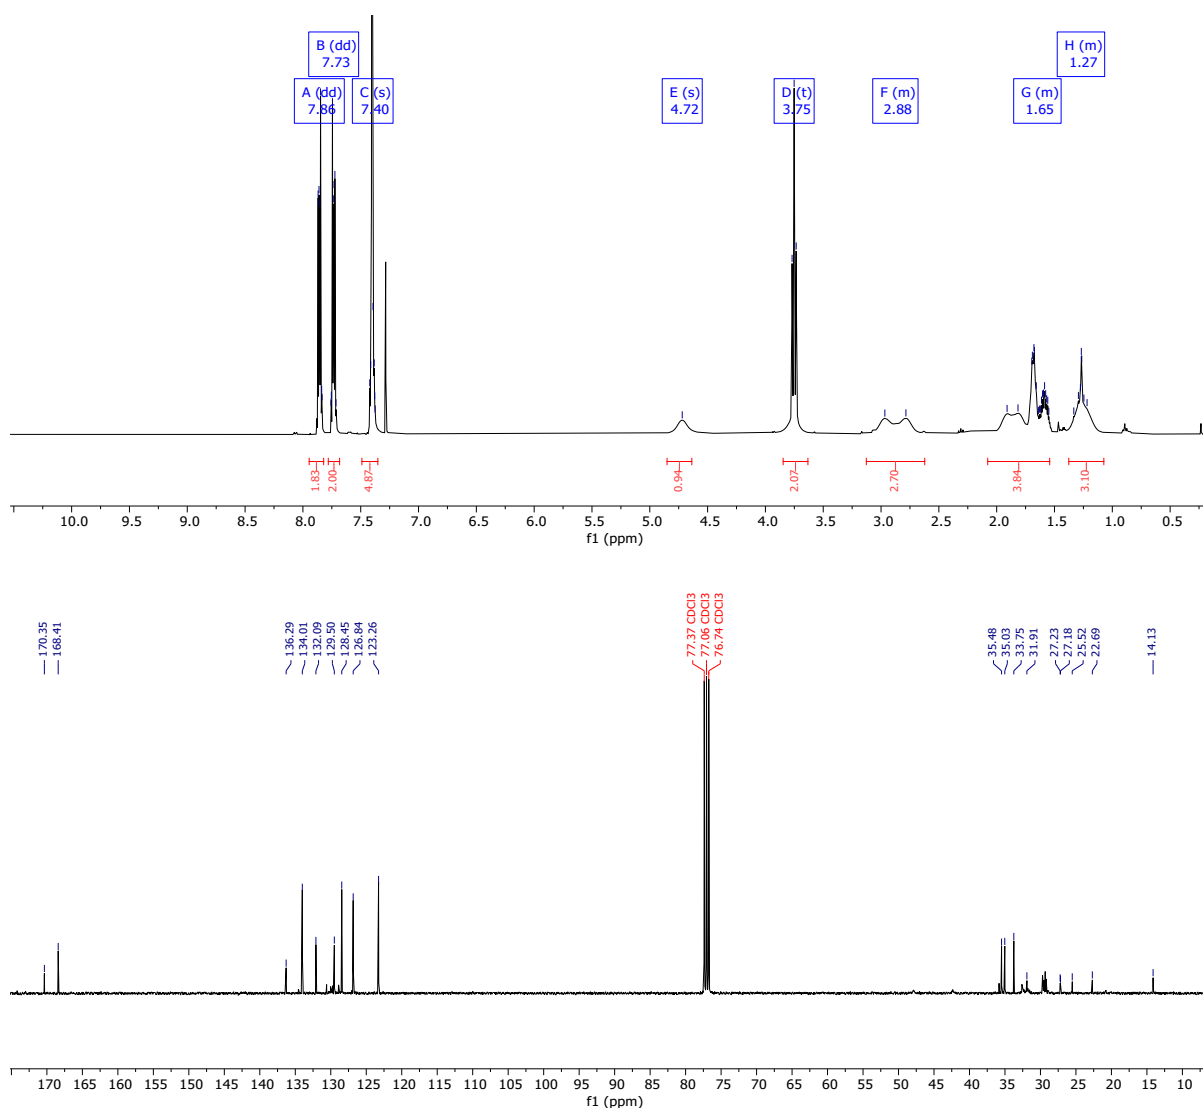

**Phth-Et-Bn-4-amine · 2 HCl (6e)**

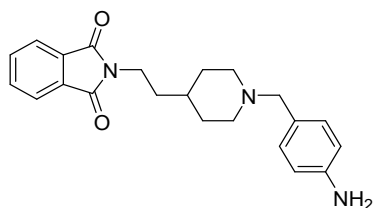

*2-(2-(1-(4-aminobenzyl)piperidin-4-yl)ethyl)isoindoline-1,3-dione*

Obtained through the reaction of **5b** with *N*-Boc-4-aminobenzyl chloride and subsequent boc-deprotection, yellow solid (86 %)

**<sup>1</sup>H NMR** (400 MHz, D<sub>2</sub>O) δ 7.87 – 7.80 (m, 4H), 7.66 – 7.61 (m, 2H), 7.53 – 7.47 (m, 2H), 4.34 (s, 2H), 3.71 (t, *J* = 6.8 Hz, 2H), 3.53 (d, *J* = 12.5 Hz, 2H), 2.98 (t, *J* = 13.2 Hz, 2H), 2.09 (d, *J* = 14.3 Hz, 2H), 1.68 – 1.60 (m, 3H), 1.48 – 1.41 (m, 2H)

**<sup>13</sup>C NMR** (101 MHz, D<sub>2</sub>O) δ 170.78, 134.67, 132.94, 131.33, 123.46, 123.27, 52.52, 35.13, 33.42, 30.54, 28.74.

**ESI [M+H]<sup>+</sup>**: 364.2020, found: 364.2020

Obtained through the reaction of **5b** with *N*-Boc-4-aminobenzyl chloride and subsequent boc-deprotection, yellow solid (86 %)

**Purity**: 95.3%

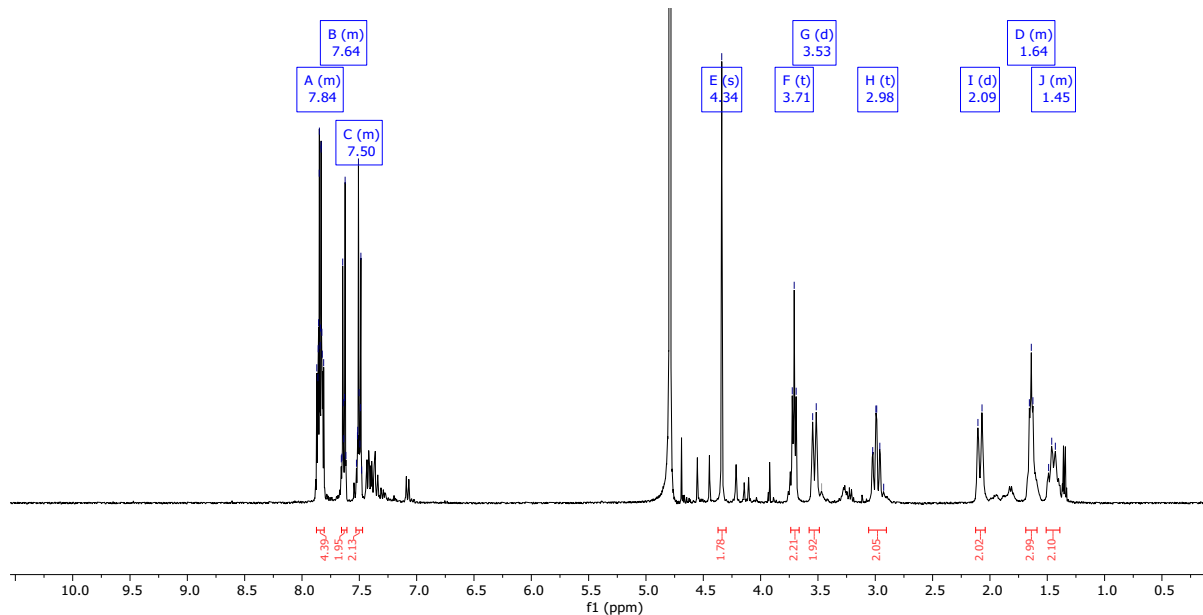

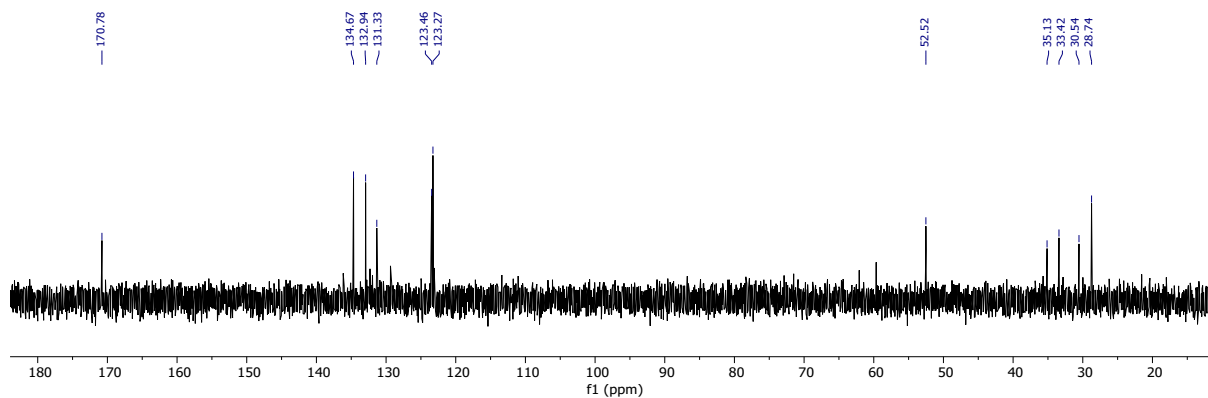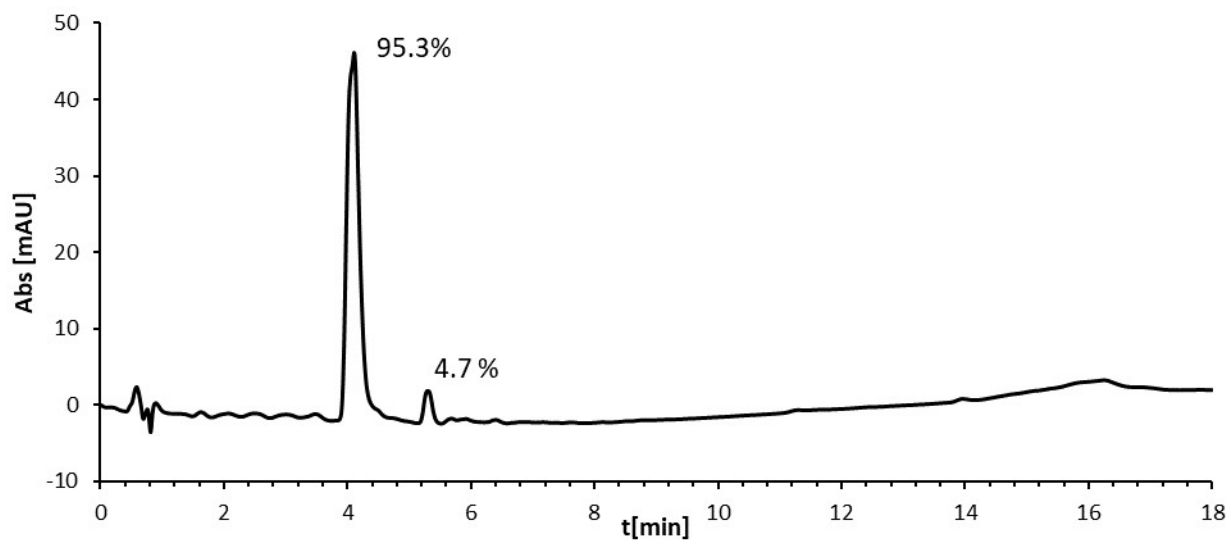

**Phth-Et-Bn-3-amine · 2 HCl (6f)**

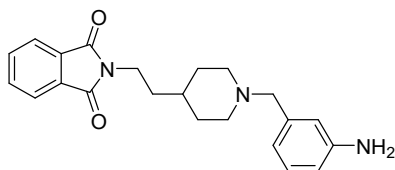

*2-(2-(1-(3-aminobenzyl)piperidin-4-yl)ethyl)isoindoline-1,3-dione*

Obtained through the reaction of **5b** with *N*-Boc-3-aminobenzyl chloride and subsequent boc-deprotection, orange solid (74 %)

**<sup>1</sup>H NMR** (400 MHz, D<sub>2</sub>O)  $\delta$  7.71 (dd,  $J$  = 5.5, 3.0 Hz, 2H), 7.66 – 7.61 (m, 3H), 7.61 – 7.46 (m, 3H), 4.35 (s, 2H), 3.54 (q,  $J$  = 7.6 Hz, 3H), 3.09 – 2.96 (m, 2H), 2.04 (d,  $J$  = 14.0 Hz, 2H), 1.70 – 1.35 (m, 5H).

**<sup>13</sup>C NMR** (101 MHz, D<sub>2</sub>O)  $\delta$  171.04, 135.63, 133.59, 131.90, 131.85, 131.63, 125.79, 124.79, 124.09, 60.65, 53.44, 36.06, 35.48, 34.44, 31.52, 29.65.

**ESI [M+H]<sup>+</sup>**: 364.2020, found: 364.2020

**Purity**: 96.4%

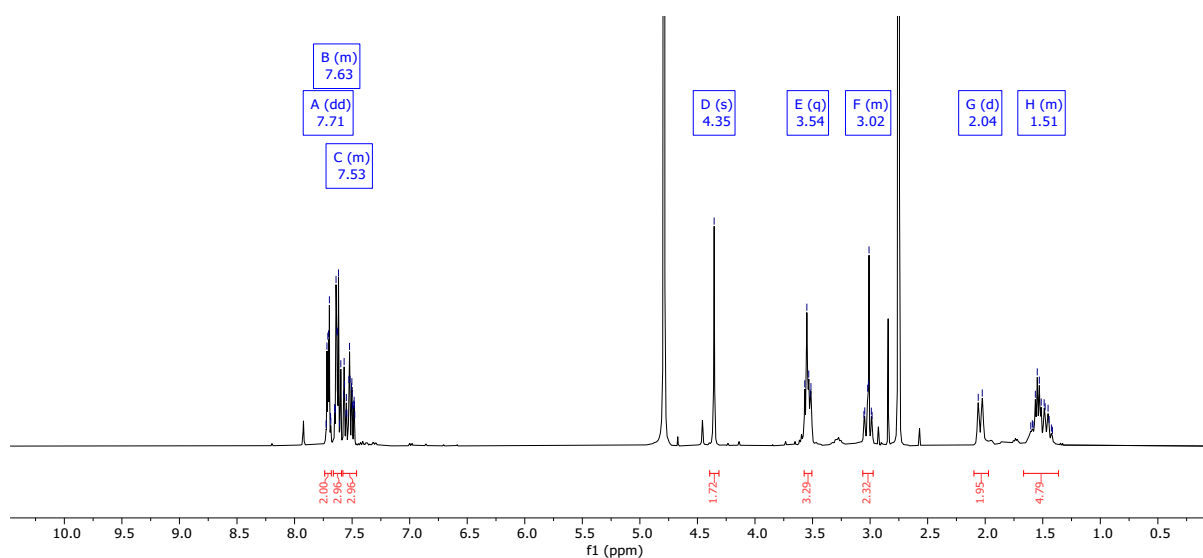



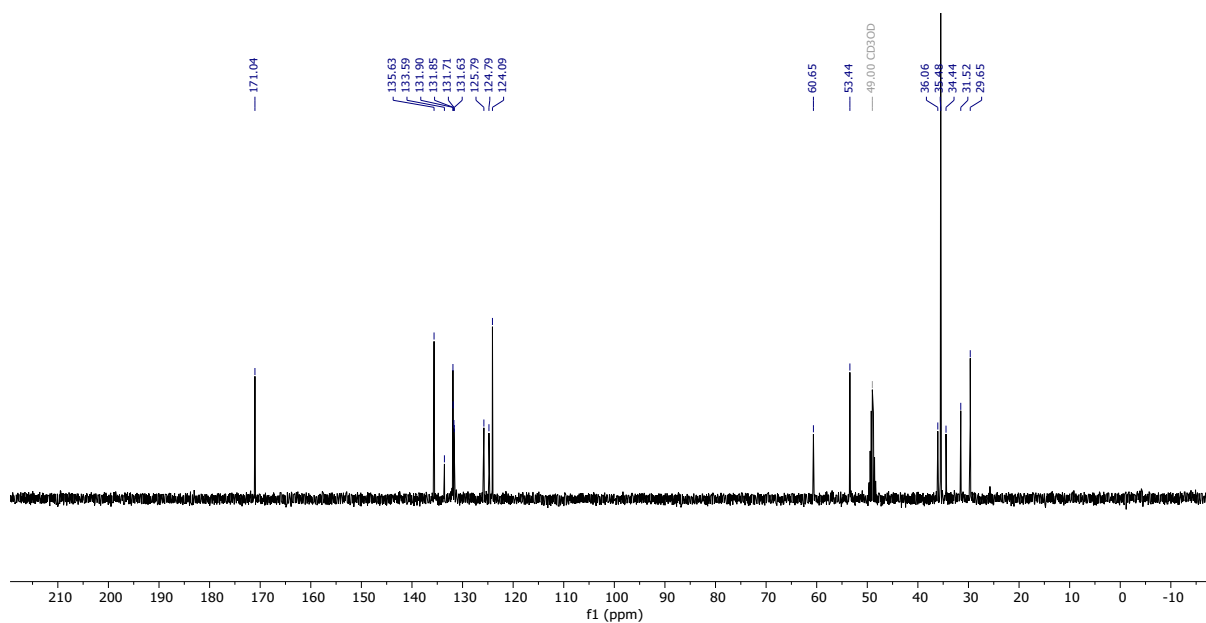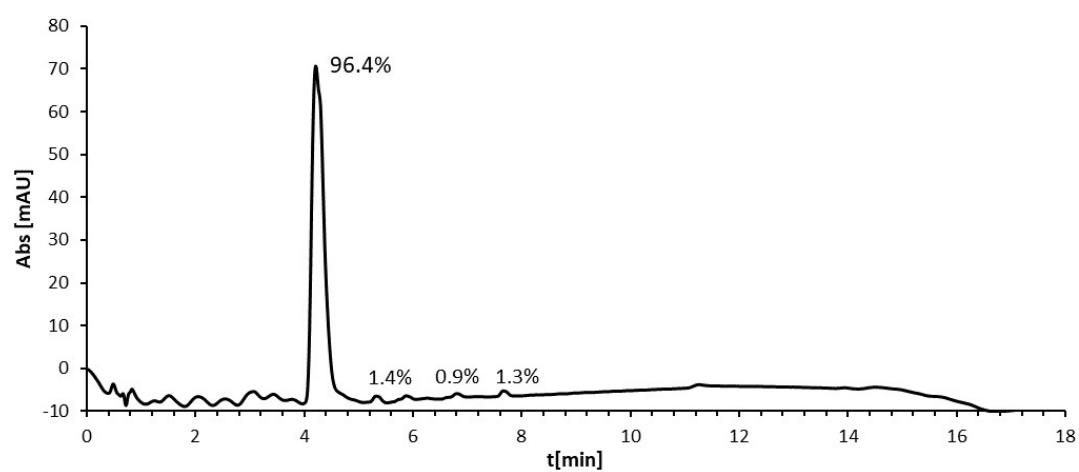

**Phth-Et-Bn-4-methylamine · 2 HCl (6g)**

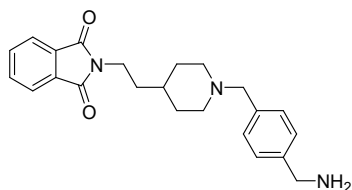

*2-(2-(1-(4-(aminomethyl)benzyl)piperidin-4-yl)ethyl)isoindoline-1,3-dione*

Obtained through the reaction of **5b** with 4-cyanobenzyl chloride and subsequent reduction with hydrogen, yellow solid (43 %)

**<sup>1</sup>H NMR** (400 MHz, D<sub>2</sub>O) δ 7.70 – 7.67 (m, 5H), 7.47 (s, 3H), 4.23 (s, 2H), 4.15 (s, 2H), 3.56 (q, *J* = 2.9 Hz, 3H), 3.40 (dd, *J* = 36.9, 12.6 Hz, 3H), 2.89 (dt, *J* = 15.9, 11.3 Hz, 3H), 1.95 (t, *J* = 12.5 Hz, 3H), 1.57 – 1.48 (m, 4H), 1.39 – 1.35 (m, 3H).

**<sup>13</sup>C NMR** (101 MHz, D<sub>2</sub>O) δ 170.50, 134.70, 131.92, 131.12, 129.48, 123.22, 60.05, 52.48, 43.93, 42.59, 35.14, 33.65, 33.45, 30.67, 30.58, 28.75, 28.03.

**ESI [M+H]<sup>+</sup>**: 378.2176, found 378.2176

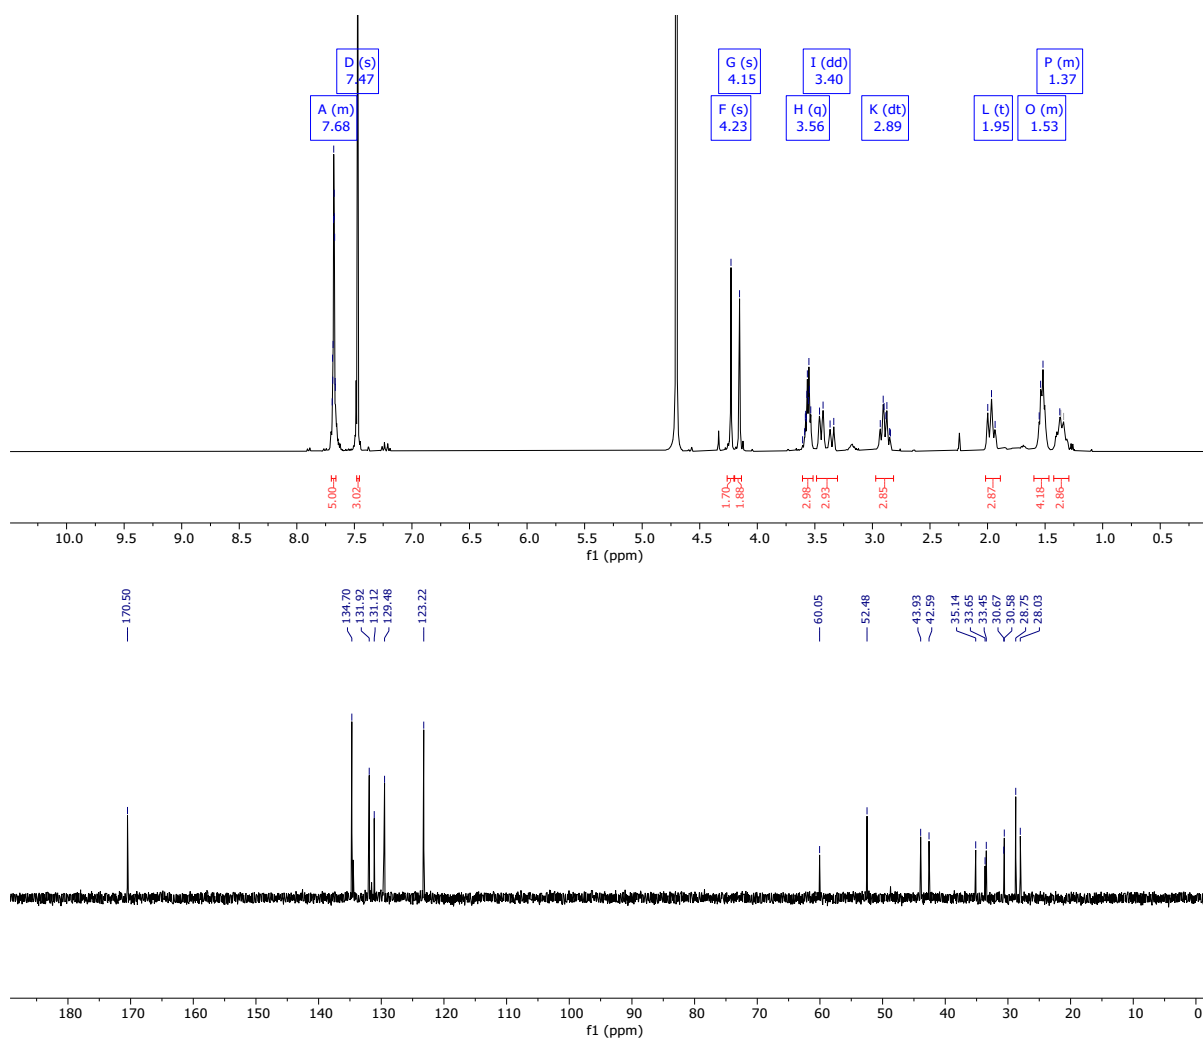

**Phth-Et-Bn-3-methylamine · 2 HCl (6h)**

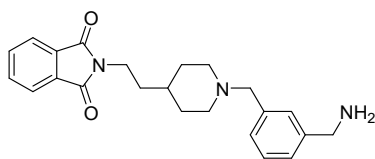

*2-(2-(1-(3-(aminomethyl)benzyl)piperidin-4-yl)ethyl)isoindoline-1,3-dione*

Obtained through the reaction of **5b** with 3-cyanobenzyl chloride and subsequent reduction with hydrogen, yellow solid (64 %)

**<sup>1</sup>H NMR** (400 MHz, D<sub>2</sub>O) δ 7.72 – 7.68 (m, 2H), 7.63 (dd, *J* = 5.6, 3.1 Hz, 2H), 7.57 – 7.53 (m, 4H), 4.31 (s, 2H), 4.22 (s, 2H), 3.57 – 3.48 (m, 4H), 2.97 (td, *J* = 12.7, 3.0 Hz, 2H), 2.01 (t, *J* = 12.4 Hz, 3H), 1.62 – 1.41 (m, 6H), 1.33 (dt, *J* = 7.5, 2.6 Hz, 3H).

**ESI [M+H]<sup>+</sup>**: 378.2175 found, 378.2175

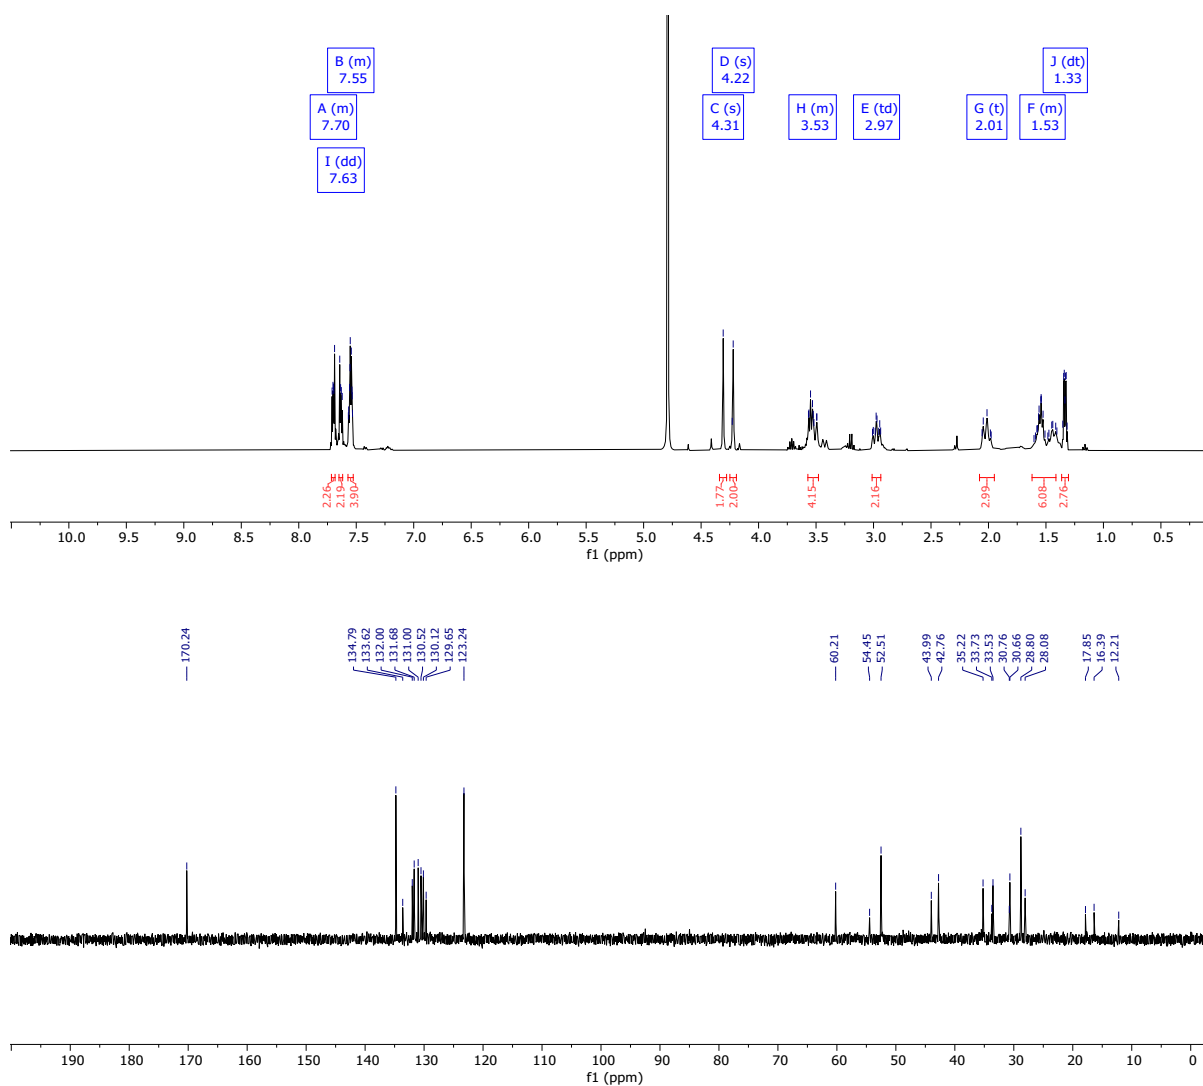

### 3. Determination of Acetylcholinesterase Activity

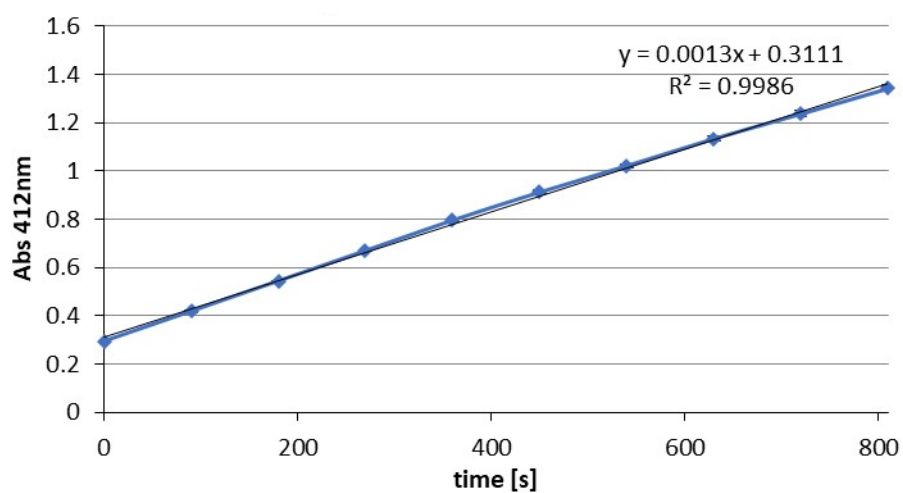

Figure S1: AChE assay in the absence of any inhibitor showing the linearity of the system.

## 4. Molecular Docking Data

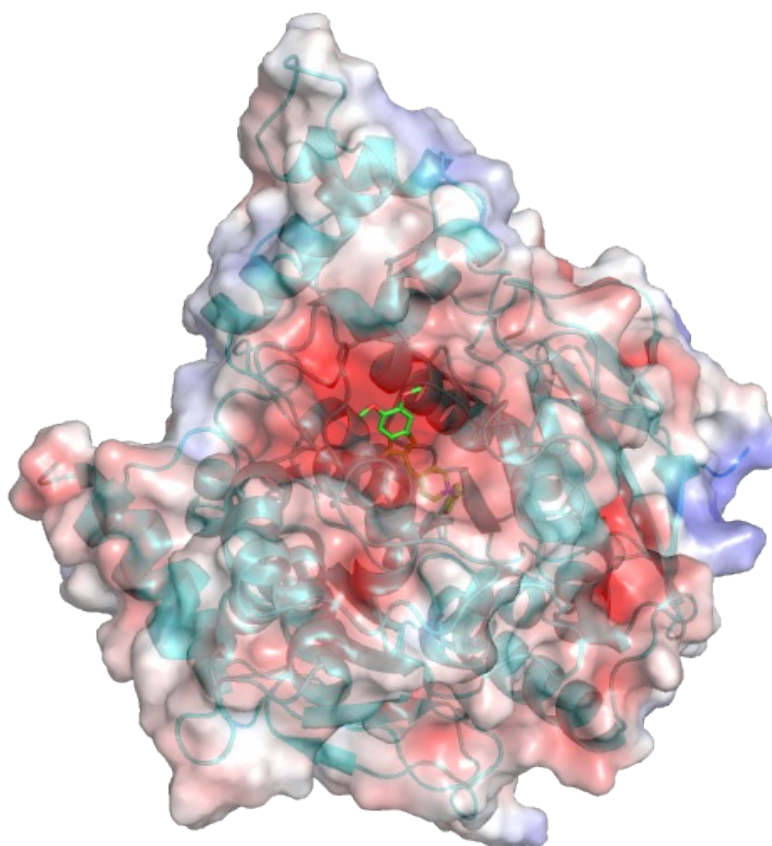

Figure S2: AChE surface coloured by electrostatic potential, red: negative, blue: positive. PDB-ID 6O4W, donepezil depicted with green carbon atoms. The electrostatic potential was calculated using the Adaptive Poisson-Boltzmann Solver (APBS) <sup>5</sup> plugin within PyMOL

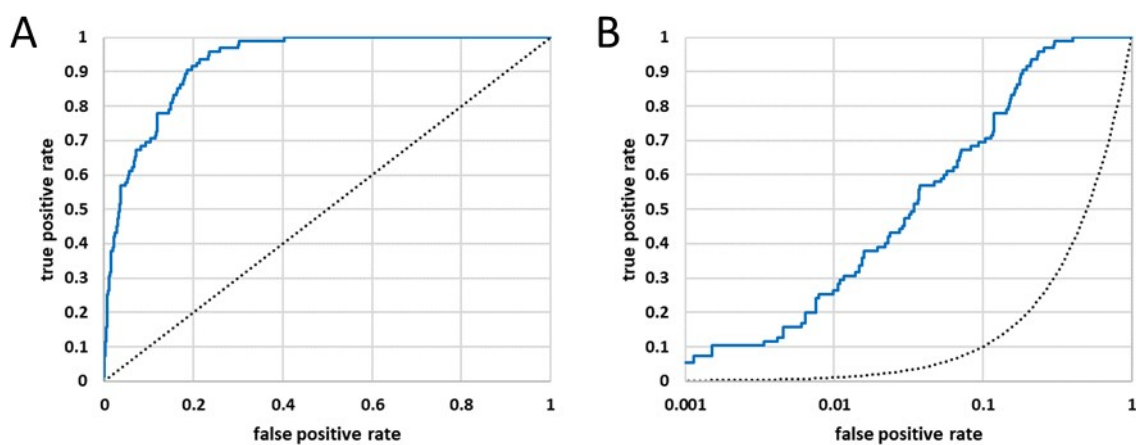

Figure S3: ROC binder-decoy discrimination analysis for 95 binders and 2649 decoys. A) The ROC curve is depicted as a blue line (ROC-AUC = 0.93). Generally, possible AUC-values are between 0 and

*1 with 1 describing a perfect discrimination and 0.5 a random distribution as indicated by the dotted line. B) Semilogarithmic ROC to evaluate early enrichment is depicted by the blue line (adjusted ROC  $\log AUC_{0.1-100\%} = 0.37$ ). Possible adjusted ROC- $\log AUC_{0.1-100\%}$  values are between -14.5 and 0.85 for perfect discrimination. Random distribution is indicated by a dotted line (ROC- $\log AUC_{0.1-100\%} = 0$ ). The obtained results indicate very strong discrimination of binders from decoys by the scoring function.*

Table S1: Physicochemical properties, docking scores and inhibition results. Physicochemical properties were predicted with MOE. Docking was conducted with HYBRID. For racemic ligands only the value for the better scoring enantiomer is shown.

| compound       | H-bond acceptors | H-bond donors | h_logP | SlogP | logP(o/w) | h_logD | TPSA [Å] | rotatable bonds | pK <sub>a</sub> | pK <sub>b</sub> | docking score [kcal/mol] | pIC <sub>50</sub> | IC <sub>50</sub> [nM] |
|----------------|------------------|---------------|--------|-------|-----------|--------|----------|-----------------|-----------------|-----------------|--------------------------|-------------------|-----------------------|
| acotiamide     | 9                | 3             | 2.7    | 3.0   | 2.0       | 0.7    | 113.0    | 10              | 7.5             | 4.9             | -13.3                    | 5.5               | 3000 <sup>6</sup>     |
| 1              | 4                | 1             | 2.0    | 2.4   | 2.1       | -0.9   | 47.6     | 6               | -               | 4.0             | -12.5                    | 5.0               | 9450                  |
| 2a (donepezil) | 4                | 0             | 3.8    | 4.6   | 4.1       | 1.6    | 38.8     | 8               | -               | 4.7             | -18.8                    | 8.0               | 11.0                  |
| 2b             | 5                | 0             | 3.9    | 4.0   | 3.6       | 3.9    | 55.8     | 7               | -               | -               | -17.5                    | 4.7               | 17,900                |
| 2c             | 5                | 2             | 1.8    | 2.1   | 1.4       | -1.3   | 64.8     | 8               | -               | 3.9             | -14.2                    | 5.0               | 11,200                |
| 2d             | 5                | 2             | 2.1    | 2.5   | 1.9       | -2.8   | 64.8     | 9               | -               | 3.8             | -15.7                    | 5.0               | 10,800                |
| 2e             | 5                | 2             | 2.3    | 2.9   | 2.3       | -3.2   | 64.8     | 10              | -               | 3.7             | -16.9                    | 4.8               | 14,600                |
| 2f             | 5                | 2             | 3.1    | 4.2   | 3.5       | 0.8    | 64.8     | 8               | -               | 4.4             | -18.0                    | 7.0               | 99.1                  |
| 2g             | 5                | 2             | 3.2    | 4.2   | 3.5       | 0.8    | 64.8     | 8               | -               | 4.5             | -17.9                    | 7.3               | 47.3                  |
| 2h             | 5                | 2             | 3.4    | 4.4   | 3.4       | -1.1   | 64.8     | 9               | -               | 4.3             | -18.6                    | 5.2               | 5800                  |
| 2i             | 5                | 2             | 3.4    | 4.4   | 3.4       | -1.1   | 64.8     | 9               | -               | 4.4             | -15.6                    | 6.0               | 1030                  |
| 2j             | 6                | 1             | 5.1    | 5.9   | 5.1       | 3.0    | 67.9     | 10              | -               | 4.7             | -8.8                     | 4.6               | 22,800                |
| 2k             | 6                | 1             | 3.3    | 4.3   | 3.8       | 0.9    | 76.1     | 9               | 4.6             | 4.8             | -16.8                    | 4.1               | 72,200                |
| 6a             | 4                | 0             | 3.8    | 3.5   | 3.6       | 1.8    | 40.6     | 6               | -               | 4.9             | -11.8                    | 4.6               | 22,800                |
| 6b             | 5                | 2             | 3.2    | 3.0   | 2.9       | 0.9    | 66.6     | 6               | -               | 4.6             | -10.7                    | 4.6               | 25,200                |
| 6c             | 4                | 0             | 4.1    | 3.9   | 4.0       | 1.9    | 40.6     | 7               | -               | 4.7             | -16.9                    | 7.9               | 13.2                  |
| 6d             | 5                | 0             | 4.1    | 3.2   | 3.4       | 4.1    | 57.7     | 6               | -               | -               | -18.6                    | 4.2               | 63,000                |
| 6e             | 5                | 2             | 3.4    | 3.4   | 3.3       | 1.0    | 66.6     | 7               | -               | 4.4             | -17.2                    | 6.5               | 327                   |
| 6f             | 5                | 2             | 3.4    | 3.4   | 3.4       | 1.1    | 66.6     | 7               | -               | 4.5             | -17.1                    | 6.8               | 150                   |
| 6g             | 5                | 2             | 3.6    | 3.6   | 3.3       | -0.9   | 66.6     | 8               | -               | 4.4             | -19.1                    | 5.8               | 1535                  |
| 6h             | 5                | 2             | 3.6    | 3.6   | 3.3       | -0.8   | 66.6     | 8               | -               | 4.4             | -18.6                    | 6.5               | 299.0                 |

## 5. References

1. B. Terra, P. da Silva, A. Tramarin, L. Franco, E. da Cunha, F. Macedo Junior, T. Ramalho, M. Bartolini, M. Bolognesi and Â. de Fátima, *J. Braz. Chem. Soc.*, 2018, **4**, 738-747.
2. K. Nepali, A. C. Wu, W. L. Lo, B. Chopra, M. J. Lai, J. Y. Chuang and J. P. Liou, *Eur J Med Chem*, 2023, **248**, 115054.
3. H. Sugimoto, Y. Iimura, Y. Yamanishi and K. Yamatsu, *J. Med. Chem.*, 1995, **38**, 4821-4829.
4. H. Sugimoto, Y. Tsuchiya, H. Sugumi, K. Higurashi, N. Karibe, Y. Iimura, A. Sasaki, S. Araki, Y. Yamanishi and K. Yamatsu, *J. Med. Chem.*, 1992, **35**, 4542-4548.
5. E. Jurrus, D. Engel, K. Star, K. Monson, J. Brandi, L. E. Felberg, D. H. Brookes, L. Wilson, J. Chen, K. Liles, M. Chun, P. Li, D. W. Gohara, T. Dolinsky, R. Konecny, D. R. Koes, J. E. Nielsen, T. Head-Gordon, W. Geng, R. Krasny, G. W. Wei, M. J. Holst, J. A. McCammon and N. A. Baker, *Protein Sci.*, 2018, **27**, 112-128.
6. Y. Matsunaga, T. Tanaka, K. Yoshinaga, S. Ueki, Y. Hori, R. Eta, Y. Kawabata, K. Yoshii, K. Yoshida, T. Matsumura, S. Furuta, M. Takei, J. Tack and Z. Itoh, *J Pharmacol Exp Ther*, 2011, **336**, 791-800.
